# Supplementary material
Source: PubMed Central journal article supplement (PMC4882740)
Supplement: oc6b00119_si_007.pdf [file oc6b00119_si_007.pdf]

Supporting Information for

**Isolation and Reactivity of Trifluoromethyl Iodonium Salts**

Johnathan N. Brantley, Andrew V. Samant, and F. Dean Toste<sup>1</sup>

|                                                                                                        |     |
|--------------------------------------------------------------------------------------------------------|-----|
| General considerations.....                                                                            | S2  |
| Synthesis of <b>1</b> •HCl.....                                                                        | S3  |
| Synthesis of <b>1</b> •AcCl.....                                                                       | S3  |
| Synthesis of <b>2</b> •HCl.....                                                                        | S3  |
| Synthesis of <b>2</b> •MeCl.....                                                                       | S4  |
| Synthesis of hydroxy(perfluoropropyl)iodonium tosylate.....                                            | S4  |
| Synthesis of chloro(4-trimethylsilylphenyl)perfluoropropyl iodane ( <b>11</b> ).....                   | S5  |
| Procedures for halide metathesis reactions.....                                                        | S5  |
| Synthesis of <b>1</b> •HBArF <sub>24</sub> .....                                                       | S6  |
| Synthesis of <b>1</b> •HOTf.....                                                                       | S6  |
| Computational data.....                                                                                | S7  |
| Oxidation of Ph <sub>3</sub> PAu(4-CH <sub>3</sub> -C <sub>6</sub> H <sub>4</sub> ) and Ferrocene..... | S15 |
| Figure S1. Ultraviolet-visible absorption profiles for ferrocene oxidation products.....               | S17 |
| Synthesis of benzyl 3-methyl-1 <i>H</i> -indole-1-carboxylate.....                                     | S18 |
| Trifluoromethylation of benzyl 3-methyl-1 <i>H</i> -indole-1-carboxylate.....                          | S18 |
| Representative procedure for alcohol trifluoromethylation.....                                         | S18 |
| Trifluoromethylation of benzotriazole.....                                                             | S19 |
| Trifluoromethylation of benzimidazole.....                                                             | S20 |
| Trifluoromethylation of 1,1-diphenyl ethylene.....                                                     | S20 |
| Trifluoromethylation of 2-ethoxycarbonyl-1-cyclopentanone.....                                         | S20 |

|                                                         |     |
|---------------------------------------------------------|-----|
| Trifluoromethylation of diphenylphosphate.....          | S20 |
| Trifluoromethylation of dodecanethiol.....              | S21 |
| Trifluoromethylation of <i>p</i> -toluenesulfonate..... | S21 |
| NMR spectra.....                                        | S22 |
| References.....                                         | S27 |
| Crystallographic data.....                              | S29 |
| DSC and TGA data for <b>1•HCl</b> .....                 | S44 |
| Figure S2. Cyclic voltammetry experiments.....          | S45 |

### General considerations

Unless otherwise noted, all commercial reagents were used without further purification. 4-fluorobiphenyl was purified by column chromatography (pentane eluent) prior to use. 2-(2-hydroxyethyl)isoindoline-1,3-dione,<sup>1</sup> Ph<sub>3</sub>PAu(4-CH<sub>3</sub>-C<sub>6</sub>H<sub>4</sub>),<sup>2</sup> and sodium tetrakis(3,5-trifluoromethyl)phenylborate (NaBArF<sub>24</sub>)<sup>3</sup> were prepared according to previously reported procedures. Small-scale reactions were run in conical Eppendorf tubes (1.0 mL). Unless otherwise noted, reactions were conducted without taking precautions to exclude air or moisture. Dichloromethane (CH<sub>2</sub>Cl<sub>2</sub>) and acetonitrile (MeCN) used in moisture-sensitive reactions were purified by passage through an activated alumina column under argon. Thin-layer chromatography analysis of reaction mixtures was performed using Merck silica gel 60 F254 TLC plates, and visualized under UV or by staining with KMnO<sub>4</sub>. Flash column chromatography was carried out on Merck Silica Gel 60 Å, 230 X 400 mesh. Nuclear magnetic resonance (NMR) spectra were recorded using Bruker DRX-500, AVQ-400 and AV-600 spectrometers. <sup>1</sup>H and <sup>13</sup>C NMR chemical shifts are reported in ppm downfield of tetramethylsilane and referenced to residual solvent peaks. <sup>19</sup>F NMR chemical shifts are reported in ppm relative to CFCl<sub>3</sub> (external standard). <sup>31</sup>P NMR chemical shifts are reported in ppm relative to phosphoric acid (external standard). Multiplicities are reported using the following abbreviations: s = singlet, d = doublet, t = triplet, q = quartet, m = multiplet, br = broad resonance. Mass spectral data were obtained from the Micro-Mass/Analytical Facility operated by the College of Chemistry, University of California, Berkeley using a Thermo LTQ-FT for ESI spectra and a Waters AutoSpec Premier for EI spectra. X-ray crystallographic data were collected at the University of California, Berkeley College of Chemistry X-ray Crystallography Facility. Cyclic voltammetry experiments (referenced versus Ag/AgNO<sub>3</sub>) were conducted in MeCN using tetrabutylammonium hexafluorophosphate (0.1 M) as the electrolyte, a glassy carbon working electrode, and a Pt wire counter electrode. *Caution: we anticipate all iodonium salts could exhibit violent thermal decomposition; due care should be taken when handling or synthesizing these reagents.*

### Synthesis of **1•HCl**

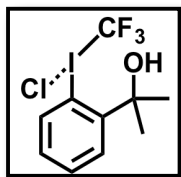

**Caution:** **1•HCl** was found to decompose violently when heated above 100 °C; due care should be taken when handling or synthesizing this reagent. A 50 mL flask was charged with 3,3-dimethyl-1-(trifluoromethyl)-1,2-benziodoxole (1.0 g; 3.0 mmol) and CHCl<sub>3</sub> (15 mL). The resultant solution was sparged with HCl gas (generated *ex situ* using NaCl and H<sub>2</sub>SO<sub>4</sub>) for approximately 5 minutes, after which the reaction mixture was allowed to sit at room temperature for 30 minutes. The mixture was concentrated under reduced pressure and subsequently washed with pentane (3 x 15 mL) to afford **1•HCl** as a white solid (1.05 g; 96% yield). Single crystals of **1•HCl** spontaneously formed from a saturated CDCl<sub>3</sub> solution and were analyzed by X-ray crystallography (see Figure 4 in the main text). <sup>1</sup>H NMR (CDCl<sub>3</sub>, 400 MHz, δ): 7.99 (d, *J* = 8.2 Hz, 1H), 7.62-7.53 (m, 2H), 7.36 (t, *J* = 7.7 Hz, 1H), 1.74 (s, 6H). <sup>13</sup>C{<sup>1</sup>H} NMR (CDCl<sub>3</sub>, 150.9 MHz δ): 147.6, 135.9, 132.2, 130.4, 128.9, 115.2, 75.1, 31.1 (C<sub>CF<sub>3</sub></sub> signal not observed due to heteroatom coupling). <sup>19</sup>F NMR (CDCl<sub>3</sub>, 376.5 MHz, δ): -27.2 (s). HRMS (ESI) Calc'd for C<sub>10</sub>H<sub>11</sub>F<sub>3</sub>IO [M-Cl]<sup>+</sup>: 330.9801; found 330.9791.

### Synthesis of **1•AcCl**

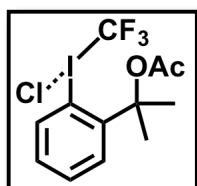

A 40 mL scintillation vial was charged with **1•HCl** (20.0 mg; 0.05 mmol) and acetyl chloride (2.0 mL; 28.1 mmol). The resultant suspension was sonicated for 5 minutes, after which the reaction mixture was allowed to sit at room temperature for 8 hours. The mixture was concentrated under reduced pressure and subsequently washed with pentane (3 x 5 mL) to afford **1•AcCl** as a white solid (16.7 mg; 75% yield). Single crystals of **1•AcCl** spontaneously grew within the mother liquor during the acylation reaction and were analyzed by X-ray crystallography (see Scheme 2 in the main text). <sup>1</sup>H NMR (CD<sub>2</sub>Cl<sub>2</sub>, 400 MHz, δ): 8.39 (d, *J* = 7.9 Hz, 1H), 7.74-7.73 (m, 2H), 7.41-7.36 (m, 1H), 2.16 (s, 3H), 2.03 (s, 6H). <sup>13</sup>C{<sup>1</sup>H} NMR (CD<sub>2</sub>Cl<sub>2</sub>, 150.9 MHz δ): 169.3, 145.5, 141.4, 133.2, 131.1, 129.3, 82.1, 28.3, 22.7 (C<sub>CF<sub>3</sub></sub> signal not observed due to heteroatom coupling). <sup>19</sup>F NMR (CDCl<sub>3</sub>, 376.5 MHz, δ): -31.5 (s). HRMS (ESI) Calc'd for C<sub>12</sub>H<sub>13</sub>F<sub>3</sub>IO<sub>2</sub> [M-Cl]<sup>+</sup>: 372.9907; found 372.9900.

### Synthesis of **2•HCl**

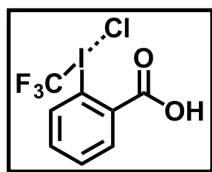

**Caution:** **2•HCl** was found to decompose violently when heated above 100 °C; due care should be taken when handling or synthesizing this reagent. A 100 mL flask was charged with 1-(trifluoromethyl)-1,2-benziodoxol-3-(1H)-one (1.58 g; 5.0 mmol), CH<sub>2</sub>Cl<sub>2</sub> (50 mL), and a stir bar. The resultant solution was stirred vigorously and sparged with HCl gas (generated *ex situ* using NaCl and H<sub>2</sub>SO<sub>4</sub>) for approximately 30 minutes. The precipitated white solid was collected on a fritted funnel and washed with CH<sub>2</sub>Cl<sub>2</sub> (3 x 15 mL) to afford **2•HCl** (1.0 g; 57% yield). Single crystals of **2•HCl** formed from a solution in MeCN at -30 °C and were analyzed by X-ray crystallography (see Figure 5 in the main text). <sup>1</sup>H NMR (DMSO-d<sub>6</sub>, 600 MHz,

$\delta$ ): 8.48 (d,  $J = 7.9$  Hz, 1H), 8.21 (dd,  $J = 7.7, 1.7$  Hz, 1H), 7.82 (t,  $J = 7.5$  Hz, 1H), 7.73 (td,  $J = 7.7, 1.7$  Hz, 1H).  $^{13}\text{C}\{^1\text{H}\}$  NMR (DMSO- $d_6$ , 150.9 MHz  $\delta$ ): 165.4, 138.5 (m), 135.2, 132.6, 131.7, 130.5, 120.0 (m), 109.2 (q,  $J = 389$  Hz). Spectrum shows trace 2-iodobenzoic acid from decomposition during collection.  $^{19}\text{F}$  NMR (DMSO- $d_6$ , 376.5 MHz,  $\delta$ ): -34.3 (s). HRMS (ESI) Calc'd for  $\text{C}_8\text{H}_5\text{F}_3\text{IO}_2$   $[\text{M}-\text{Cl}]^+$ : 316.9281; found 316.9284.

### Synthesis of 2•MeCl

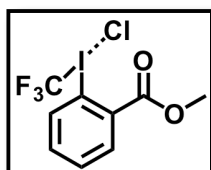

A 50 mL flask was charged with 1-trifluoromethyl-1,2-benziodoxol-3-(1H)-one (0.63 g; 2.0 mmol),  $\text{CH}_2\text{Cl}_2$  (20 mL),  $N,N$ -dimethylformamide (1 drop), and a stir bar. The vessel was placed under a  $\text{N}_2$  atmosphere, and oxalyl chloride (1.7 mL; 20 mmol) was added dropwise at room temperature. The reaction mixture was stirred for 30 minutes, after which time the vessel was cooled to 0 °C. Methanol (10 mL) was added in a single portion, and the reaction mixture was immediately concentrated under reduced pressure. Subsequent washing with diethyl ether (3 x 15 mL) afforded **2•MeCl** as a white solid (0.32 g; 43% yield). Single crystals of **2•MeCl** were obtained by vapor diffusion of pentane into a  $\text{CH}_2\text{Cl}_2$  solution and analyzed by X-ray crystallography (see Scheme 2 in the main text).  $^1\text{H}$  NMR ( $\text{CDCl}_3$ , 500 MHz,  $\delta$ ): 8.47 (d,  $J = 8.0$  Hz, 1H), 8.37-8.33 (m, 1H), 7.79 (t,  $J = 7.4$  Hz, 1H), 7.71-7.65 (m, 1H), 4.05 (s, 3H).  $^{13}\text{C}\{^1\text{H}\}$  NMR ( $\text{CDCl}_3$ , 125 MHz  $\delta$ ): 163.7, 139.5, 135.9, 133.2, 132.6, 128.7, 120.6, 53.6 ( $\text{C}_{\text{CF}_3}$  signal not observed due to heteroatom coupling).  $^{19}\text{F}$  NMR ( $\text{CDCl}_3$ , 376.5 MHz,  $\delta$ ): -33.4 (s). HRMS (ESI) Calc'd for  $\text{C}_9\text{H}_7\text{F}_3\text{IO}_2$   $[\text{M}-\text{Cl}]^+$ : 330.9437; found 330.9476.

### Synthesis of hydroxy(perfluoropropyl)iodonium tosylate

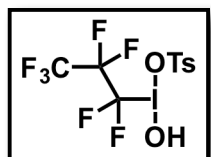

A 50 mL flask was charged with trifluoroacetic anhydride (11 mL; 78 mmol), trifluoroacetic acid (10 mL; 131 mmol), and a stir bar. The reaction mixture was cooled to 0 °C, and a 30% aqueous solution of hydrogen peroxide (1.2 mL, 12 mmol) was added dropwise. The mixture was then stirred at room temperature for 5 minutes, after which time perfluoropropyl iodide (1.4 mL, 10 mmol) was added slowly. The reaction mixture was stirred for 16 hours at room temperature and then concentrated under reduced pressure (Note: the temperature should be kept below 25°C). The resulting oil was taken up in 40 mL MeCN, and  $p$ -toluenesulfonic acid monohydrate (1.90 g; 10 mmol) was added in one portion. The mixture was stirred vigorously at room temperature for 1 hour, and the resulting precipitate was collected by filtration, washed with a small amount of MeCN, and dried in air to yield hydroxy(perfluoropropyl)iodonium tosylate as an off-white solid (1.83 g; 34% yield). Spectroscopic characterization was in agreement with literature reports.<sup>4</sup>

*Synthesis of chloro(4-trimethylsilylphenyl)perfluoropropylidone (11)*

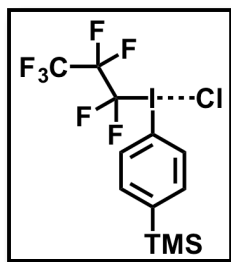

A 50 mL Schlenk flask was charged with hydroxy(perfluoropropyl)iodonium tosylate (484 mg; 1.0 mmol), 1,4-bis(trimethylsilyl)benzene (400 mg; 1.8 mmol), and a stir bar. The vessel was placed under a N<sub>2</sub> atmosphere, and anhydrous CH<sub>2</sub>Cl<sub>2</sub> (15 mL) was added. The reaction mixture was cooled to 0 °C, and BF<sub>3</sub> etherate (220 μL, 12 mmol) was added dropwise. The mixture was then stirred at room temperature for 3 hours, after which time brine (20 mL) was added at 0 °C. The biphasic mixture was stirred several minutes, partitioned, and the aqueous layer was extracted with CH<sub>2</sub>Cl<sub>2</sub> (2 x 10 mL). The combined organic layers were dried over magnesium sulfate and concentrated under reduced pressure. The resulting material was taken up in a mixture of diethyl ether/hexanes (1:1 v/v), and the resulting precipitate was collected by filtration, washed with a small amount of hexanes, and dried **11** as a white solid (94 mg; 20% yield). Single crystals of **11** were obtained from a saturated pentane solution at -30 °C and analyzed using X-ray crystallography (see Figure 4 in the main text). <sup>1</sup>H NMR (CDCl<sub>3</sub>, 500 MHz, δ): 8.07 (d, *J* = 7.9 Hz, 2H), 7.65 (d, *J* = 7.8 Hz, 2H), 0.32 (s, 9H). <sup>13</sup>C{<sup>1</sup>H} NMR (CDCl<sub>3</sub>, 125 MHz δ): 147.7, 136.9, 134.5, 120.3, -1.4 (perfluorinated carbons appear as a set of complex multiplets between 120 and 106). <sup>19</sup>F NMR (CDCl<sub>3</sub>, 376.5 MHz, δ): -78.8 (t, *J* = 8.0; 3F), -86.4 (q, *J* = 8.0, 2F), -119.6 (s, 2F). HRMS (ESI) Calc'd for C<sub>12</sub>H<sub>13</sub>F<sub>7</sub>ISi [M-Cl]<sup>+</sup>: 444.9714; found 444.9710.

*Procedures for halide metathesis reactions*

**1•HF**: A 4 dram vial that was wrapped in aluminum foil was charged with **1•HCl** (5.0 mg; 0.01 mmol), AgF (1.7 mg; 0.01 mmol), MeCN (0.5 mL), and a stir bar. The reaction mixture was stirred vigorously for 1 hour, after which the mixture was filtered through a 0.45 μm syringe filter and analyzed by <sup>19</sup>F NMR. The only observed product was 3,3-dimethyl-1-(trifluoromethyl)-1,2,-benziodoxole.

In a separate experiment, a 4 dram vial was charged with 3,3-dimethyl-1-(trifluoromethyl)-1,2,-benziodoxole (16 mg; 0.05 mmol), triethylamine trihydrofluoride (16 μL; 0.10 mmol), and CH<sub>2</sub>Cl<sub>2</sub> (1.0 mL). The reaction mixture was allowed to sit at room temperature for 1 hour, after which time the mixture was analyzed by <sup>19</sup>F NMR. The only observed species was the starting material.

**1•HBr**: A 4 dram vial was charged with **1•HCl** (20 mg; 0.05 mmol), NaBr (57 mg; 0.5 mmol), acetone (0.5 mL), and a stir bar. The reaction mixture was stirred vigorously for 1 hour, after which the mixture was filtered through a 0.45 μm syringe filter and analyzed by <sup>19</sup>F NMR. CF<sub>3</sub>Br, CF<sub>3</sub>I, and 3,3-dimethyl-1-(trifluoromethyl)-1,2,-benziodoxole were the predominantly observed products.

In a separate experiment, a 50 mL flask was charged with 3,3-dimethyl-1-(trifluoromethyl)-1,2,-benziodoxole (95 mg; 0.3 mmol) and CHCl<sub>3</sub> (15 mL). HBr gas (generated *ex situ* using NaBr and H<sub>2</sub>SO<sub>4</sub>) was bubbled through the resultant solution for approximately 5 minutes at room temperature (Note: the HBr gas was first passed through a CH<sub>2</sub>Cl<sub>2</sub> solution of phenol to remove excess Br<sub>2</sub>). The reaction mixture was

allowed to sit at room temperature for 30 minutes, after which time the solvent was removed under reduced pressure.  $^{19}\text{F}$  NMR analysis revealed a 6:1 mixture of 3,3-dimethyl-1-(trifluoromethyl)-1,2-benziodoxole and another product (tentatively assigned as **1•HBr**); however, **1•HBr** decomposed into  $\text{CF}_3\text{Br}$  and  $\text{CF}_3\text{I}$  (along with small amounts of other products that were not identified) upon sitting at room temperature.

**1•HI**: A 4 dram vial was charged with **1•HCl** (5.0 mg; 0.01 mmol), NaI (2.0 mg; 0.01 mmol), acetone (0.5 mL), and a stir bar. The reaction mixture was stirred vigorously for 1 hour, after which the mixture was filtered through a 0.45  $\mu\text{m}$  syringe filter and analyzed by  $^{19}\text{F}$  NMR.  $\text{CF}_3\text{I}$ , and 3,3-dimethyl-1-(trifluoromethyl)-1,2-benziodoxole were the only observed products.

#### Synthesis of **1•HBArF<sub>24</sub>**

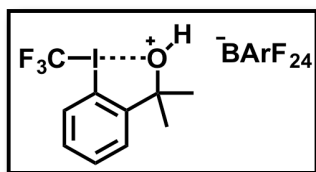

In a  $\text{N}_2$  filled glove box, a 4 dram vial was charged with **1•HCl** (20 mg; 0.05 mmol),  $\text{NaBArF}_{24}$  (48 mg; 0.05 mmol),  $\text{CH}_2\text{Cl}_2$  (2 mL), and a stir bar. The reaction mixture was stirred at room temperature for 5 minutes, after which the mixture was filtered through a 0.45  $\mu\text{m}$  syringe filter and concentrated under reduced pressure. The resulting material was washed with pentane (3 x 5 mL) and dried to afford **1•HBArF<sub>24</sub>** as a white solid (59 mg; 91% yield).  $^1\text{H}$  NMR ( $\text{CD}_2\text{Cl}_2$ , 400 MHz,  $\delta$ ): 7.74 (br, 9H), 7.66-7.61 (br, 4H), 7.57 (br, 3H), 4.97 (br, 1H), 1.72 (br, 6H).  $^{13}\text{C}\{^1\text{H}\}$  NMR ( $\text{CD}_2\text{Cl}_2$ , 150.9 MHz  $\delta$ ): 161.7 (q,  $^1J_{\text{B-C}} = 49.8$  Hz), 145.2, 134.8, 133.6, 133.4, 130.6, 129.9, 128.9 (q,  $^2J_{\text{C-F}} = 31.7$  Hz), 124.5 (q,  $^1J_{\text{C-F}} = 271$  Hz), 117.5, 107.8, 77.8, 29.5 ( $\text{C}_{\text{CF}_3}$  signal not observed due to heteroatom coupling).  $^{19}\text{F}$  NMR ( $\text{CD}_2\text{Cl}_2$ , 376.5 MHz,  $\delta$ ): -16.6 (s, 3F), -60.1 (s, 24F). HRMS (ESI) Calc'd for  $\text{C}_{10}\text{H}_{11}\text{F}_3\text{IO} [\text{M-BArF}_{24}]^+$ : 330.9801; found 330.9810.

#### Synthesis of **1•HOTf**

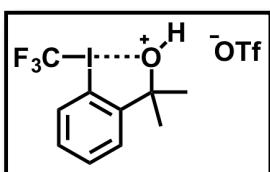

In a  $\text{N}_2$  filled glove box, a 4 dram vial was charged with **1•HCl** (20 mg; 0.05 mmol),  $\text{NaOTf}$  (9.8 mg; 0.05 mmol),  $\text{CH}_2\text{Cl}_2$  (2 mL), and a stir bar. The reaction mixture was stirred at room temperature for 5 minutes, after which the mixture was filtered through a 0.45  $\mu\text{m}$  syringe filter and analyzed by NMR.  $^{19}\text{F}$  NMR ( $\text{CH}_2\text{Cl}_2$ , 376.5 MHz,  $\delta$ ): -33.3 (s, 3F), -77.9 (s, 3F).

**1•HOTf** was found to readily decompose in solution (primarily affording  $\text{CF}_3\text{OTf}$ ), and the isolated solid was also prone to decomposition. In an attempt to obtain single crystals of **1•HOTf** by slow evaporation of a  $\text{CH}_2\text{Cl}_2$  solution, we actually obtained **1•HBF<sub>4</sub>** (Figure 3). The formation of **1•HBF<sub>4</sub>** is attributed to abstraction of boron from the borosilicate glassware used during the crystallization by a decomposition product of **1•HOTf**.

### Computational data

Electronic structure calculations were conducted on 3,3-dimethyl-1-(trifluoromethyl)-1,2,-benziodoxole, 1-trifluoromethyl-1,2-benziodoxol-3-(1H)-one, **1•HCl**, and **2•HCl** using Gaussian<sup>5</sup> at the University of California, Berkeley College of Chemistry Molecular Graphics and Computational Facility. All calculations employed density functional theory and the B3-LYP exchange-correlation energy functional. To ensure that computational results were not qualitatively basis set dependent, both the 6-311+G(d,p) and aug-cc-PVTZ basis sets were used for atoms other than I. An effective core potential (Gaussian code SDD) was used for I. The previously reported crystal structures of 3,3-dimethyl-1-(trifluoromethyl)-1,2,-benziodoxole<sup>6</sup> and 1-trifluoromethyl-1,2-benziodoxol-3-(1H)-one<sup>7</sup> were used as the initial structures for optimization, with the I–O and I–CF<sub>3</sub> bond lengths constrained to the observed distances in the solid state to facilitate convergence. The crystal structures of **1•HCl** and **2•HCl** reported in this study were used as the initial structures for optimization, with the I–Cl and I–CF<sub>3</sub> bond lengths constrained to the observed distances in the solid state to facilitate convergence. In the case of **2•HCl**, only one of the four inequivalent molecules in the asymmetric unit was selected for computational evaluation. Atom coordinates (in Å) and energies (in Ha) are tabulated below:

3,3-dimethyl-1-(trifluoromethyl)-1,2,-benziodoxole (aug-cc-PVTZ; E = -773.45049761)

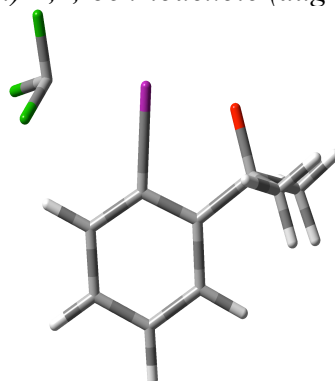

|   |             |             |             |
|---|-------------|-------------|-------------|
| I | 0.73262400  | -0.92793600 | -0.10653800 |
| O | -1.18967700 | -1.78669000 | -0.33358200 |
| F | 2.90077000  | 1.10813500  | -0.96704000 |
| F | 2.69803100  | 1.07910000  | 1.19284000  |
| F | 3.61757600  | -0.60190400 | 0.16581500  |
| C | -0.52849300 | 0.82265700  | -0.07643400 |
| C | -0.05630200 | 2.12247700  | -0.11338400 |
| H | 0.99413800  | 2.35191700  | -0.17987700 |
| C | -0.98823100 | 3.15345300  | -0.07261900 |
| H | -0.64760200 | 4.17875000  | -0.10928500 |
| C | -2.34436200 | 2.86137700  | 0.01223900  |
| H | -3.06857200 | 3.66381700  | 0.04718700  |
| C | -2.77586500 | 1.54308500  | 0.04936100  |
| H | -3.83350300 | 1.33012500  | 0.11731400  |
| C | -1.86478000 | 0.48518900  | -0.00165000 |
| C | -2.28258500 | -0.99353400 | 0.05211500  |
| C | -2.71629800 | -1.34506300 | 1.48882600  |
| H | -1.90226600 | -1.16449300 | 2.19157800  |
| H | -2.97694700 | -2.40241500 | 1.53096300  |
| H | -3.57878600 | -0.75790200 | 1.80756300  |
| C | -3.42230800 | -1.27767400 | -0.93677800 |
| H | -3.12044200 | -1.00790900 | -1.94779200 |
| H | -4.33417900 | -0.73617800 | -0.68310100 |
| H | -3.64196800 | -2.34448000 | -0.91713400 |
| C | 2.62107500  | 0.31051300  | 0.08719600  |



3,3-dimethyl-1-(trifluoromethyl)-1,2-benziodoxole (6-311+G(d,p); E = -773.35613081)

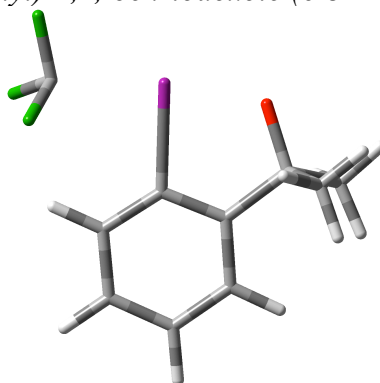

|   |             |             |             |
|---|-------------|-------------|-------------|
| I | 0.74888700  | -0.93904100 | -0.10267700 |
| O | -1.17617900 | -1.79088200 | -0.33232100 |
| F | 2.86558800  | 1.13967500  | -0.97059100 |
| F | 2.68311800  | 1.09198600  | 1.19598200  |
| F | 3.64230400  | -0.55793200 | 0.14810900  |
| C | -0.54481600 | 0.84210700  | -0.07339700 |
| C | -0.07646600 | 2.14408800  | -0.10591600 |
| H | 0.97486800  | 2.38130600  | -0.16650600 |
| C | -1.02323200 | 3.16783400  | -0.06923700 |
| H | -0.69193700 | 4.19901800  | -0.10330600 |
| C | -2.38010400 | 2.85969900  | 0.00860000  |
| H | -3.11438700 | 3.65640000  | 0.04047000  |
| C | -2.80008400 | 1.53352900  | 0.04296500  |
| H | -3.85814100 | 1.30851100  | 0.10655000  |
| C | -1.87505300 | 0.48184700  | -0.00408000 |
| C | -2.27670600 | -1.00814400 | 0.05104000  |
| C | -2.70597900 | -1.36157400 | 1.49164900  |
| H | -1.89054700 | -1.17432300 | 2.19499400  |
| H | -2.95641100 | -2.42396200 | 1.53360900  |
| H | -3.57523900 | -0.78086900 | 1.81394300  |
| C | -3.41024000 | -1.30887500 | -0.94370100 |
| H | -3.10621600 | -1.03467000 | -1.95545100 |
| H | -4.33453800 | -0.78131200 | -0.69265500 |
| H | -3.61046000 | -2.38188100 | -0.92406000 |
| C | 2.61974000  | 0.32689900  | 0.08397000  |

*1-trifluoromethyl-1,2-benziodoxol-3-(1H)-one* (aug-cc-PVTZ;  $E = -768.86897295$ )

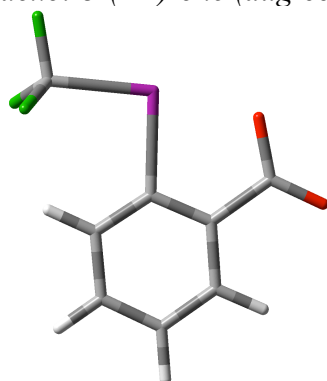

|   |             |             |             |
|---|-------------|-------------|-------------|
| I | -0.70952600 | -0.90438300 | 0.00030300  |
| F | -2.43406800 | 1.32937500  | 1.08275800  |
| F | -3.50715100 | -0.21767300 | 0.00010100  |
| F | -2.43328600 | 1.32775400  | -1.08459900 |
| O | 3.45205000  | -1.85498200 | -0.00055600 |
| O | 1.22543700  | -2.11639100 | 0.00017000  |
| C | -2.39520400 | 0.53848900  | -0.00011200 |
| C | 2.32022500  | -1.41380000 | -0.00019700 |
| C | 2.08353100  | 0.08513200  | -0.00011200 |
| C | 0.81379000  | 0.62572600  | 0.00024300  |
| C | 0.54612700  | 1.98150900  | 0.00046300  |
| H | -0.45344600 | 2.38262100  | 0.00071700  |
| C | 1.63907900  | 2.84405000  | 0.00038500  |
| H | 1.46397900  | 3.91086200  | 0.00059700  |
| C | 2.93706400  | 2.34340600  | -0.00002300 |
| H | 3.77592000  | 3.02539900  | -0.00010600 |
| C | 3.15802700  | 0.97485300  | -0.00030700 |
| H | 4.15325100  | 0.55310300  | -0.00056000 |

*1-trifluoromethyl-1,2-benziodoxol-3-(1H)-one (6-311+G(d,p); E = -768.77779561)*

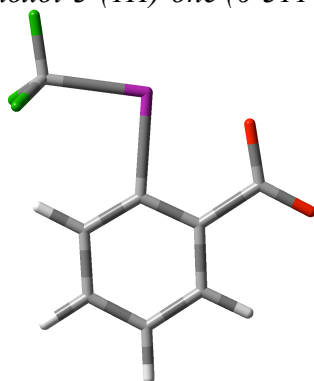

|   |             |             |             |
|---|-------------|-------------|-------------|
| I | -0.73208600 | -0.91227400 | -0.00018600 |
| F | -2.40671800 | 1.34900800  | 1.08605900  |
| F | -3.52790400 | -0.16556800 | 0.00055600  |
| F | -2.40731900 | 1.34901500  | -1.08554900 |
| O | 3.44129300  | -1.88708500 | 0.00065000  |
| O | 1.20644600  | -2.11856500 | -0.00041100 |
| C | -2.39423200 | 0.55764500  | 0.00020200  |
| C | 2.31248400  | -1.43683800 | 0.00012400  |
| C | 2.09311900  | 0.07312600  | 0.00007200  |
| C | 0.83609400  | 0.64060900  | -0.00017500 |
| C | 0.57483500  | 1.99800500  | -0.00038400 |
| H | -0.42315100 | 2.40887900  | -0.00067800 |
| C | 1.68390100  | 2.84786300  | -0.00028600 |
| H | 1.52192100  | 3.91941700  | -0.00049700 |
| C | 2.97794500  | 2.32731600  | 0.00004500  |
| H | 3.82797500  | 2.99933100  | 0.00018700  |
| C | 3.18181000  | 0.95227200  | 0.00021700  |
| H | 4.17365000  | 0.51599400  | 0.00044900  |

**1•HCl** (*aug-cc-PVTZ*;  $E = -1234.31263290$ )

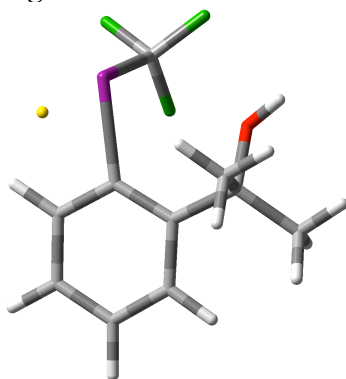

|    |             |             |             |
|----|-------------|-------------|-------------|
| C  | 0.69149400  | 0.26915100  | 0.76988000  |
| C  | 1.76105700  | -0.42046200 | 0.19291100  |
| C  | 2.91306900  | -0.48931000 | 0.98432100  |
| H  | 3.77796900  | -1.00638600 | 0.60005100  |
| C  | 2.99282600  | 0.07961200  | 2.24710600  |
| H  | 3.91113000  | -0.00542300 | 2.81143700  |
| C  | 1.90434300  | 0.75012500  | 2.77913300  |
| H  | 1.94937200  | 1.20047300  | 3.76051800  |
| C  | 0.74188100  | 0.84914000  | 2.02922000  |
| H  | -0.10743300 | 1.38795700  | 2.41941500  |
| C  | 1.77489400  | -1.02698700 | -1.21658500 |
| C  | 2.03133900  | 0.07550200  | -2.25560100 |
| H  | 1.98496700  | -0.35070700 | -3.26096300 |
| H  | 3.02566200  | 0.50023600  | -2.11954000 |
| H  | 1.31305700  | 0.88941000  | -2.17868300 |
| C  | 2.81055200  | -2.14679600 | -1.37398100 |
| H  | 2.67437200  | -2.91568200 | -0.61509200 |
| H  | 3.83497900  | -1.77995100 | -1.33557000 |
| H  | 2.67137600  | -2.60692500 | -2.35289400 |
| C  | -2.01343500 | -1.31246200 | 0.45355200  |
| O  | 0.47437500  | -1.61345800 | -1.40540800 |
| H  | 0.35811300  | -1.80825300 | -2.34102900 |
| F  | -1.18460400 | -2.03285700 | 1.20743100  |
| F  | -2.38285100 | -2.04946500 | -0.60310800 |
| F  | -3.12504800 | -1.06592900 | 1.17533800  |
| Cl | 0.01104600  | 3.08519000  | -0.97434700 |
| I  | -1.18475400 | 0.63252600  | -0.21240000 |

*1*•HCl (6-311+G(d,p);  $E = -1234.21431071$ )

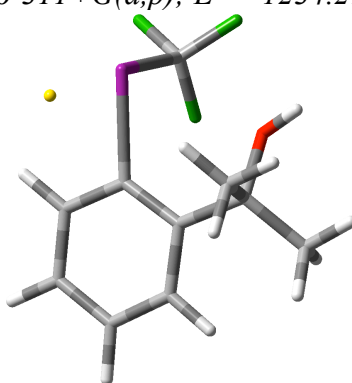

|    |             |             |             |
|----|-------------|-------------|-------------|
| C  | 0.70043600  | 0.23003700  | 0.79948400  |
| C  | 1.77502600  | -0.39885600 | 0.16426900  |
| C  | 2.93354400  | -0.51019500 | 0.94904300  |
| H  | 3.80525300  | -0.98790600 | 0.52404500  |
| C  | 3.00947300  | -0.03168200 | 2.25263000  |
| H  | 3.93249500  | -0.14481500 | 2.80900300  |
| C  | 1.91164400  | 0.58792800  | 2.83491900  |
| H  | 1.95449000  | 0.97056300  | 3.84737600  |
| C  | 0.74104500  | 0.72505600  | 2.09611100  |
| H  | -0.11577100 | 1.22468300  | 2.52632200  |
| C  | 1.79788100  | -0.88883500 | -1.29288000 |
| C  | 2.06210200  | 0.30024900  | -2.23454400 |
| H  | 2.03220900  | -0.04022600 | -3.27553700 |
| H  | 3.05397500  | 0.71876400  | -2.04856200 |
| H  | 1.33484700  | 1.10220800  | -2.09999300 |
| C  | 2.83437400  | -1.99763900 | -1.53342500 |
| H  | 2.68711100  | -2.82770700 | -0.84023500 |
| H  | 3.86221000  | -1.63824800 | -1.45622000 |
| H  | 2.70376500  | -2.37645800 | -2.55068000 |
| C  | -1.95337800 | -1.39299000 | 0.38870700  |
| O  | 0.49565800  | -1.45413500 | -1.53723900 |
| H  | 0.39392600  | -1.59248900 | -2.48537000 |
| F  | -1.07058400 | -2.12756900 | 1.06733600  |
| F  | -2.32945800 | -2.07190200 | -0.70526200 |
| F  | -3.05054900 | -1.24342600 | 1.16172600  |
| Cl | -0.10846500 | 3.14836500  | -0.81196700 |
| I  | -1.21855500 | 0.62170100  | -0.17186600 |

**2•HCl** (*aug-cc-PVTZ*;  $E = -1229.72555675$ )

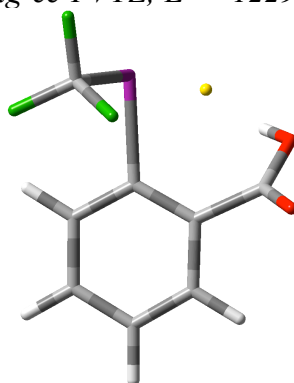

|    |             |             |             |
|----|-------------|-------------|-------------|
| C  | -2.25552400 | -0.89209300 | 0.40860200  |
| C  | 0.70750000  | -0.57260300 | -0.49521700 |
| C  | 0.68127400  | -1.38174000 | -1.62005000 |
| H  | -0.12807300 | -1.32659700 | -2.33137800 |
| C  | 1.73085400  | -2.26911700 | -1.81917800 |
| H  | 1.73079200  | -2.90231700 | -2.69498200 |
| C  | 2.76656000  | -2.33360100 | -0.89652900 |
| H  | 3.58436500  | -3.02416100 | -1.04750400 |
| C  | 2.75815600  | -1.51640800 | 0.22297100  |
| H  | 3.55049700  | -1.57521300 | 0.95537300  |
| C  | 1.72975600  | -0.59676900 | 0.44559000  |
| C  | 1.82390300  | 0.22779500  | 1.71353000  |
| O  | 1.98289400  | -0.32628900 | 2.77095100  |
| O  | 1.75737000  | 1.54736800  | 1.60798700  |
| H  | 1.69028700  | 1.90248400  | 0.67728700  |
| F  | -2.44536000 | -1.79754200 | -0.55388600 |
| F  | -3.43558000 | -0.34399300 | 0.71928400  |
| F  | -1.76288600 | -1.50523800 | 1.47828700  |
| I  | -0.95782900 | 0.75531300  | -0.26501200 |
| Cl | 1.15026500  | 2.70316100  | -1.12330200 |

**2**•HCl (6-311+G(d,p); E = -1229.62690048)

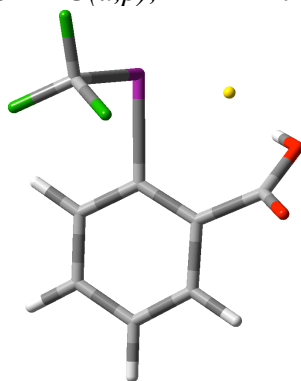

|    |             |             |             |
|----|-------------|-------------|-------------|
| C  | -2.23909300 | -0.92114100 | 0.41273200  |
| C  | 0.72341800  | -0.58439600 | -0.49394500 |
| C  | 0.70681300  | -1.39189800 | -1.62129300 |
| H  | -0.10450000 | -1.35396900 | -2.33463000 |
| C  | 1.77981300  | -2.25794300 | -1.81981300 |
| H  | 1.79221200  | -2.89346700 | -2.69701900 |
| C  | 2.82060000  | -2.29792400 | -0.89579100 |
| H  | 3.65498900  | -2.97219900 | -1.04679200 |
| C  | 2.79574500  | -1.47761300 | 0.22539900  |
| H  | 3.59076800  | -1.51920800 | 0.95991300  |
| C  | 1.74515100  | -0.57634100 | 0.44810900  |
| C  | 1.81845200  | 0.24995900  | 1.72147200  |
| O  | 1.96000500  | -0.30766100 | 2.78005800  |
| O  | 1.75553200  | 1.57074400  | 1.61616100  |
| H  | 1.69857700  | 1.92507300  | 0.68510700  |
| F  | -2.37199000 | -1.85139900 | -0.53882300 |
| F  | -3.44778600 | -0.42129100 | 0.69417800  |
| F  | -1.73728800 | -1.49333000 | 1.50224400  |
| I  | -0.98623400 | 0.75575600  | -0.27288800 |
| Cl | 1.11895600  | 2.71129300  | -1.12075600 |

Oxidation of  $Ph_3PAu(4-CH_3-C_6H_4)$  to  $Ph_3PAu(4-CH_3-C_6H_4)(CF_3)(Cl)$

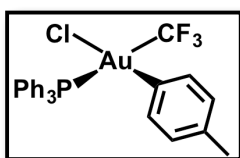

A 4 dram vial wrapped in aluminum foil was charged with  $Ph_3PAu(4-CH_3-C_6H_4)$  (12.5 mg; 0.02 mmol), **2**•MeCl (8.3 mg; 0.02 mmol), 4-fluoro-biphenyl (11.7 mg; 0.06 mmol; internal standard), and  $CD_2Cl_2$  (0.5 mL). The reaction was shaken for 2 minutes, and transferred to a foiled NMR tube.  $^{19}F$  and  $^{31}P$  NMR analyses were both consistent<sup>2</sup> with the formation of the desired Au(III) complex (**12**) as an approximately 1:1 mixture of isomers (42% yield, combined).  $^{19}F$  NMR ( $CD_2Cl_2$ , 376.5 MHz,  $\delta$ ): -29.9 (d,  $^3J_{P-F}$  = 68 Hz, *trans*), -28.8 (d,  $^3J_{P-F}$  = 45 Hz, *cis*).  $^{31}P\{^1H\}$  NMR ( $CD_2Cl_2$ , 161.9 MHz,  $\delta$ ): 23.0 (q,  $^3J_{P-F}$  = 69 Hz, *trans*), 36.3 (q,  $^3J_{P-F}$  = 44 Hz, *cis*).

In a separate experiment, A 4 dram vial wrapped in aluminum foil was charged with  $\text{Ph}_3\text{PAu}(4\text{-CH}_3\text{-C}_6\text{H}_4)$  (12.5 mg; 0.02 mmol), **1•HCl** (8.3 mg; 0.02 mmol), 4-fluoro-biphenyl (11.7 mg; 0.06 mmol; internal standard), and  $\text{CD}_2\text{Cl}_2$  (0.5 mL). The reaction was shaken for 2 minutes, and transferred to a foiled NMR tube.  $^{19}\text{F}$  and  $^{31}\text{P}$  NMR analyses were both consistent with the formation of **12** (10% yield). The primary byproducts were determined to be  $\text{Ph}_3\text{PAuCl}$  and 3,3-dimethyl-1-(trifluoromethyl)-1,2,-benziodoxole by  $^{31}\text{P}$  and  $^{19}\text{F}$  NMR, respectively. This suggests that **1•HCl** is sufficiently acidic to preferentially induce protodeauration.

#### *Oxidation of ferrocene to the ferrocenium cation*

A 4 dram vial was charged with ferrocene (5.6 mg; 0.03 mmol) and  $\text{CH}_2\text{Cl}_2$  (400  $\mu\text{L}$ ). Two aliquots of the resulting solution (100  $\mu\text{L}$  each) were transferred to two separate 4 dram vials, one containing 1-trifluoromethyl-1,2-benziodoxol-3-(1H)-one (4.8 mg; 0.02 mmol) and the other containing **2•HCl** (5.3 mg; 0.02 mmol). Both reaction mixtures were diluted with  $\text{CH}_2\text{Cl}_2$  (final volume of 3.0 mL) and stirred at room temperature for 20 minutes. The resulting solutions were filtered through a 0.45  $\mu\text{m}$  syringe filter and analyzed by ultraviolet-visible spectrophotometry (Figure S1A). The reaction between ferrocene and **2•HCl** showed a characteristic absorbance at approximately 620 nm that is consistent<sup>8</sup> with the formation of ferrocenium. In contrast, the reaction between ferrocene and 1-trifluoromethyl-1,2-benziodoxol-3-(1H)-one showed no absorbance at the aforementioned wavelength.

In a separate experiment, a 4 dram vial was charged with ferrocene (5.6 mg; 0.03 mmol) and  $\text{CH}_2\text{Cl}_2$  (400  $\mu\text{L}$ ). Two aliquots of the resulting solution (100  $\mu\text{L}$  each) were transferred to two separate 4 dram vials, one containing 3,3-dimethyl-1-(trifluoromethyl)-1,2,-benziodoxole (7.5 mg; 0.02 mmol) and the other containing **1•HCl** (8.5 mg; 0.02 mmol). Both reaction mixtures were diluted with  $\text{CH}_2\text{Cl}_2$  (final volume of 3.0 mL) and stirred at room temperature for 20 minutes. The resulting solutions were filtered through a 0.45  $\mu\text{m}$  syringe filter and analyzed by ultraviolet-visible spectrophotometry (Figure S1B). The reaction between ferrocene and **1•HCl** showed a characteristic absorbance at approximately 620 nm that is consistent<sup>8</sup> with the formation of ferrocenium. In contrast, the reaction between ferrocene and 3,3-dimethyl-1-(trifluoromethyl)-1,2,-benziodoxole showed no absorbance at the aforementioned wavelength.



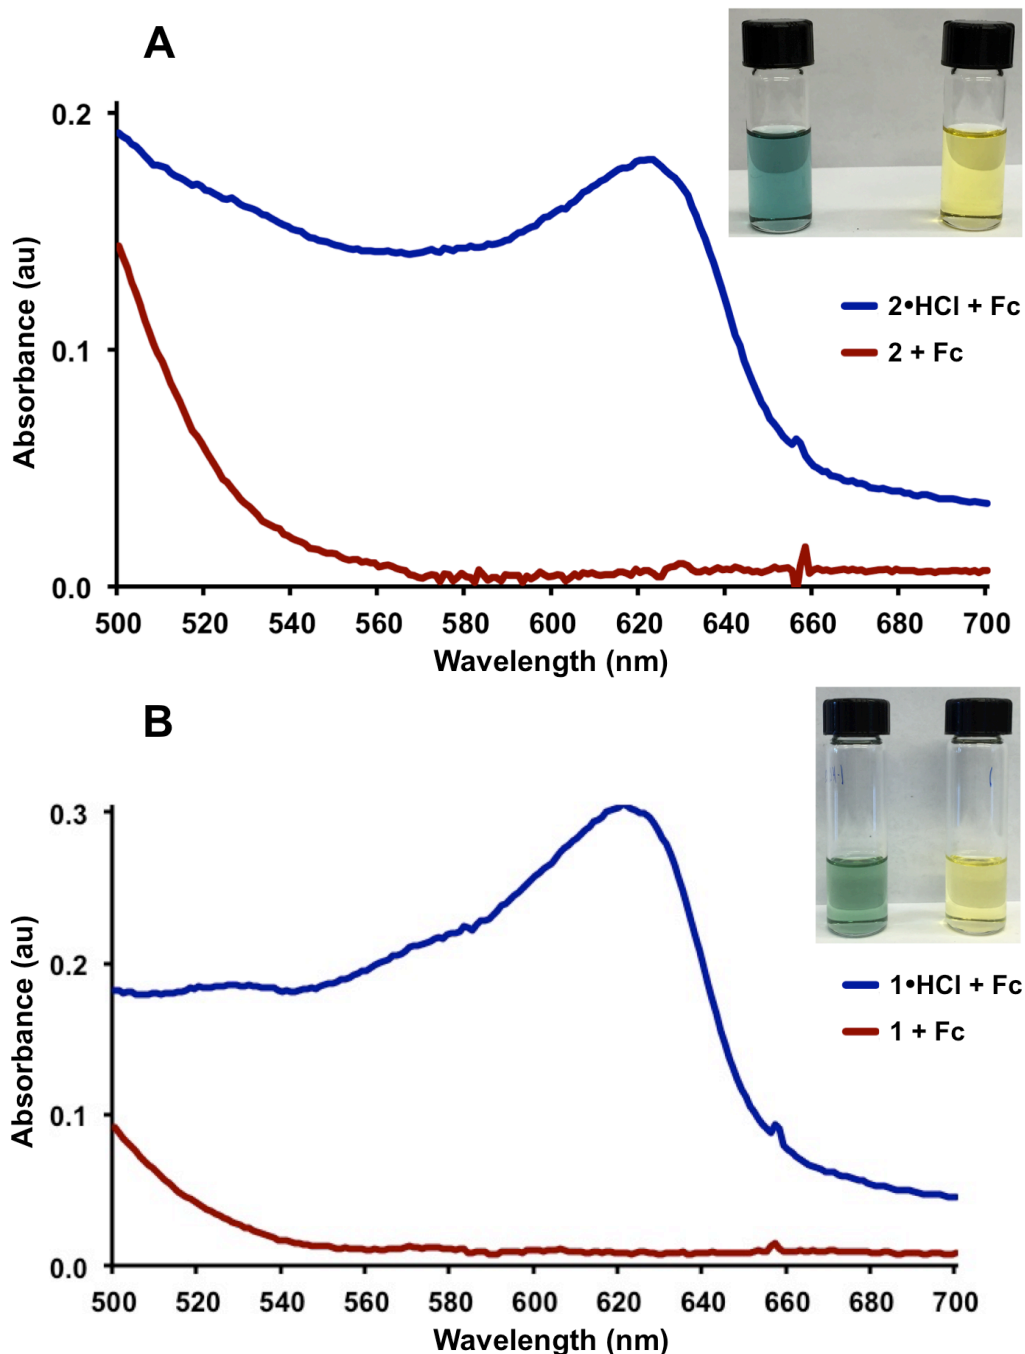

**Figure S1.** Ultraviolet-visible absorption profiles for ferrocene oxidation products. (A) Ferrocene (Fc) was oxidized to the ferrocenium ( $\text{Fc}^+$ ) cation by  $2\bullet\text{HCl}$  (Blue;  $[2\bullet\text{HCl}] = 0.007\text{ M}$ ;  $\text{CH}_2\text{Cl}_2$ ). No reaction is observed when the parent iodane (**2**) is reacted with Fc under identical conditions (Red;  $[2] = 0.007\text{ M}$ ;  $\text{CH}_2\text{Cl}_2$ ). The inset photograph shows the crude reaction mixtures using  $2\bullet\text{HCl}$  (left) and **2** (right). (B) Fc was oxidized to  $\text{Fc}^+$  by  $1\bullet\text{HCl}$  (Blue;  $[1\bullet\text{HCl}] = 0.007\text{ M}$ ;  $\text{CH}_2\text{Cl}_2$ ). No reaction is observed when the parent iodane (**1**) is reacted with Fc under identical conditions (Red;  $[1] = 0.007\text{ M}$ ;  $\text{CH}_2\text{Cl}_2$ ). The inset photograph shows the crude reaction mixtures using  $1\bullet\text{HCl}$  (left) and **1** (right).

### Synthesis of benzyl 3-methyl-1H-indole-1-carboxylate

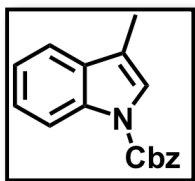

A 50 mL flask was charged with 3-methylindole (656 mg; 5.0 mmol), sodium hydroxide (600 mg; 15 mmol), tetrabutylammonium bisulfate (85 mg; 0.35 mmol), CH<sub>2</sub>Cl<sub>2</sub> (25 mL), and a stir bar. The suspension was stirred at room temperature for 1 hour, after which the mixture was cooled to 0 °C and benzyl chloroformate (1.4 mL; 10 mmol) was added dropwise. The mixture was stirred for 16 hours at room temperature, then partitioned between CH<sub>2</sub>Cl<sub>2</sub> and saturated aqueous ammonium chloride. The aqueous layer was extracted with CH<sub>2</sub>Cl<sub>2</sub> (2 x 15 mL), and the combined organic layers were washed with brine, dried over magnesium sulfate, and concentrated under reduced pressure. The resulting residue was purified by silica chromatography (5-7% ethyl acetate/hexanes eluent) to afford the desired product (**20**) as a pale orange oil (1.18 g; 89%). <sup>1</sup>H NMR (CDCl<sub>3</sub>, 600 MHz, δ): 8.20 (br, 1H), 7.54-7.49 (m, 3H), 7.45-7.38 (m, 4H), 7.37-7.33 (m, 1H), 7.31-7.27 (m, 1H), 5.46 (s, 2H), 2.28 (s, 3H). <sup>13</sup>C{<sup>1</sup>H} NMR (CDCl<sub>3</sub>, 150.9 MHz δ): 150.8, 135.6, 135.3, 131.5, 128.7, 128.6, 128.4, 124.5, 122.7, 122.3, 119.0, 117.3, 115.2, 68.4, 9.6. HRMS (EI) Calc'd for C<sub>17</sub>H<sub>15</sub>NO<sub>2</sub> [M]<sup>+</sup>: 265.1103; found 265.1106.

### Trifluoromethylation of benzyl 3-methyl-1H-indole-1-carboxylate

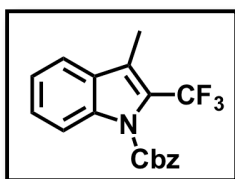

A conical plastic tube was charged with **2**•HCl (70 mg; 0.20 mmol), benzyl 3-methyl-1H-indole-1-carboxylate (80 mg; 0.30 mmol), CHCl<sub>3</sub> (400 μL), and a stir bar. The reaction mixture was stirred at 60 °C for 3 hours, after which the reaction was diluted with CH<sub>2</sub>Cl<sub>2</sub> (5 mL) and extracted with saturated aqueous sodium bicarbonate. The organic layer was dried over magnesium sulfate, concentrated, and purified by silica chromatography (10-30% CH<sub>2</sub>Cl<sub>2</sub>/hexanes eluent) to afford the desired product (**21**) as a colorless oil (33 mg; 49% yield). Benzyl 3-methyl-1H-indole-1-carboxylate (31 mg; 39% yield) could be recovered by further elution. <sup>1</sup>H NMR (CDCl<sub>3</sub>, 300 MHz, δ): 8.13 (d, *J* = 8.5 Hz, 1H), 7.60 (d, *J* = 7.9 Hz, 1H), 7.53-7.36 (m, 6H), 7.31 (t, *J* = 7.5 Hz, 1H), 5.46 (s, 2H), 2.45 (q, *J* = 3.0 Hz, 3H). <sup>13</sup>C{<sup>1</sup>H} NMR (CDCl<sub>3</sub>, 125 MHz δ): 150.4, 136.5, 134.5, 129.0, 128.89, 128.85, 128.7, 127.6, 124.1 (q, *J* = 2.8 Hz), 123.5, 122.7, 120.1, 115.8, 122.2 (q, *J* = 37.6 Hz), 69.6, 9.7 (q, *J* = 3.4 Hz). <sup>19</sup>F NMR (CDCl<sub>3</sub>, 376.5 MHz, δ): -53.9 (s). HRMS (EI) Calc'd for C<sub>18</sub>H<sub>14</sub>F<sub>3</sub>NO<sub>2</sub> [M]<sup>+</sup>: 330.0977; found 330.980.

### Representative procedure for alcohol trifluoromethylation

A conical plastic tube was charged with 2-(2-hydroxyethyl)isoindoline-1,3-dione (39.5 mg; 0.20 mmol), **1**•HCl (25.0 mg; 0.07 mmol), NaBARF<sub>24</sub> (6.0 mg; 0.007 mmol) and MeCN (140 μL). The suspension was heated at 55 °C with stirring for 16 hours, after which the reaction mixture was filtered through a 0.45 μm syringe filter and loaded onto a silica column. Elution with 30% diethyl ether in pentane afforded the desired product (**15g**) as a colorless solid (4.0 mg; 23% yield). Spectroscopic characterization was in agreement with literature<sup>9</sup> reports. The remaining products shown in Table 1 were

prepared using an analogous procedure; product yields (which are an average of at least two independent experiments) were determined using  $^{19}\text{F}$  NMR with 4-fluoro-biphenyl as an internal standard.  $^{19}\text{F}$  NMR chemical shifts were consistent<sup>9,10</sup> with previous literature reports and are tabulated below [ $^{19}\text{F}$  NMR ( $\text{CD}_2\text{Cl}_2$ , 376.5 MHz,  $\delta$ )]:

**15a**: -59.7 (s)

**15b**: -60.9 (s)

**15c**: -61.1 (s)

**15d**: -59.9 (s)

**15e**: -60.1 (s)

**15f**: -59.7 (s)

**15g**: -60.1 (s)

**15h**: -56.8 (s)

**15i**: -60.3 (s)

In a separate experiment, a conical plastic tube was charged with 1-adamantanemethanol (10.0 mg; 0.060 mmol), **1•HBArF<sub>24</sub>** (3.3 mg; 0.003 mmol), 4-fluoro-biphenyl (1.5 mg; 0.009 mmol) and MeCN (55  $\mu\text{L}$ ). The suspension was heated at 55 °C for 16 hours, after which the reaction mixture was analyzed by  $^{19}\text{F}$  NMR. The product (**15a**) was observed in 35% yield.

**1•HCl** and **2•HCl** could also be used directly for alcohol trifluoromethylations under solvolytic conditions. In one experiment, a plastic conical tube was charged with **1•HCl** (5.0 mg; 0.013 mmol), 4-fluoro-biphenyl (7.0 mg; 0.041 mmol), and 3-phenyl-1-propanol (0.5 mL). The mixture was heated at 55 °C for 16 hours, after which the reaction was analyzed by  $^{19}\text{F}$  NMR. The desired product (**15f**) was observed in 75% yield. In a separate experiment, a plastic conical tube was charged with **2•HCl** (5.0 mg; 0.014 mmol), 4-fluoro-biphenyl (7.3 mg; 0.042 mmol), and 3-phenyl-1-propanol (0.5 mL). The mixture was heated at 55 °C for 16 hours, after which the reaction was analyzed by  $^{19}\text{F}$  NMR. The desired product (**15f**) was observed in 70% yield.

#### Trifluoromethylation of benzotriazole

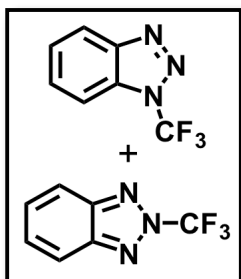

A conical plastic tube was charged with benzotriazole (10.0 mg; 0.08 mmol), **1•HCl** (10.0 mg; 0.03 mmol), NaBArF<sub>24</sub> (2.4 mg; 0.003 mmol), 4-fluoro-biphenyl (4.7 mg; 0.03 mmol), and  $\text{CH}_2\text{Cl}_2$  (55  $\mu\text{L}$ ). The suspension was heated at 55 °C for 16 hours, after which time the reaction mixture was analyzed by  $^{19}\text{F}$  NMR. The desired products (**17a** and **17b**) were obtained in 59% combined yield.  $^{19}\text{F}$  NMR ( $\text{CD}_2\text{Cl}_2$ , 376.5 MHz,  $\delta$ ): -57.0 (s; **17a**), -60.0 (s; **17b**). Spectroscopic data were in agreement with previous literature reports.<sup>11</sup>

### Trifluoromethylation of benimidazole

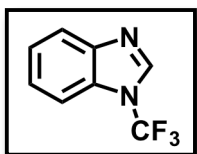

A conical plastic tube was charged with benzimidazole (5.0 mg; 0.04 mmol), **2•MeCl** (5.0 mg; 0.01 mmol), NaBArF<sub>24</sub> (1.2 mg; 0.001 mmol), 4-fluoro-biphenyl (2.3 mg; 0.01 mmol), and MeCN (27  $\mu$ L). The suspension was heated at 55 °C for 16 hours, after which time the reaction mixture was analyzed by <sup>19</sup>F NMR. The desired product (**19**) was obtained in 41% yield. <sup>19</sup>F NMR (CD<sub>2</sub>Cl<sub>2</sub>, 376.5 MHz,  $\delta$ ): -56.9 (s). Spectroscopic data were in agreement with previous literature reports.<sup>12</sup>

### Trifluoromethylation of 1,1-diphenyl ethylene

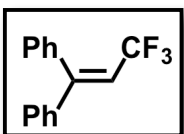

A conical plastic tube was charged with diphenylethylene (27 mg; 0.15 mmol), **2•HCl** (17.6 mg; 0.050 mmol), p-fluorobiphenyl (25.8 mg; 0.15 mmol), and CDCl<sub>3</sub> (200  $\mu$ l). The reaction mixture was heated at 60 °C for 16 hours. Analysis by <sup>19</sup>F NMR indicated formation of the desired product (**23**) in 37% yield. <sup>19</sup>F NMR (CDCl<sub>3</sub>, 376.5 MHz,  $\delta$ ): -55.2 (d,  $J = 8.4$  Hz). Spectral data are in agreement with literature reports.<sup>13</sup>

### Trifluoromethylation of 2-ethoxycarbonyl-1-cyclopentanone

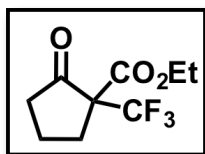

A 1 dram vial was charged with potassium 2-ethoxycarbonyl-1-cyclopentanone (9.7 mg; 0.06 mmol), p-fluorobiphenyl (25.8 mg; 0.15 mmol), CD<sub>2</sub>Cl<sub>2</sub> (1.0 mL), and a stir bar. To the suspension was added **2•MeCl** (18.3 mg; 0.05 mmol), and the mixture stirred at room temperature for 2 hours. The mixture was filtered through celite, and analysis by <sup>19</sup>F NMR indicated the formation of the desired product (**25**) in 22% yield. <sup>19</sup>F NMR (CD<sub>2</sub>Cl<sub>2</sub>, 376.5 MHz,  $\delta$ ): -68.4 (s). Spectral data are in agreement with literature reports.<sup>14</sup>

### Trifluoromethylation of diphenylphosphate

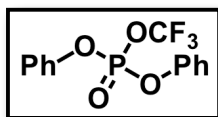

A 1 dram vial was charged with potassium diphenyl phosphate (14.4 mg, 0.050 mmol), **2•MeCl** (18.3 mg, 0.050 mmol), p-fluorobiphenyl (25.8 mg, 0.15 mmol), and a stir bar. The solids were suspended in CD<sub>2</sub>Cl<sub>2</sub> (1.0 mL) and stirred at room temperature for 2 hours. The reaction mixture was filtered through a plug of celite and analyzed by <sup>19</sup>F NMR, which indicated the desired product (**27**) was present in 45% yield. <sup>19</sup>F NMR (CD<sub>2</sub>Cl<sub>2</sub>, 376.5 MHz,  $\delta$ ): -52.0 (d; <sup>3</sup> $J_{P-F} = 4.6$  Hz). Diphenyl fluorophosphate was also observed in 12% yield. <sup>19</sup>F NMR (CD<sub>2</sub>Cl<sub>2</sub>, 376.5 MHz,  $\delta$ ): -77.3 (d;  $J_{P-F} = 1001$  Hz).

In a separate experiment, a 1 dram vial was charged with diphenylphosphoric acid (12.5 mg, 0.050 mmol), **2•MeCl** (18.3 mg, 0.050 mmol), p-fluorobiphenyl (25.8 mg, 0.15 mmol), and a stir bar. The solids were suspended in CD<sub>2</sub>Cl<sub>2</sub> (1.0 mL) and stirred at room temperature for 16 hours. The reaction mixture was filtered through a plug of celite and analyzed by <sup>19</sup>F NMR, which indicated that the desired product was formed in 6% yield.

### Trifluoromethylation of dodecanethiol

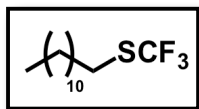

A 10 mL Schlenk flask was charged with sodium hydride (6.7 mg of a 60% suspension in mineral oil; ~0.2 mmol) and a stir bar. The flask was evacuated and backfilled with N<sub>2</sub> (3 x), and dry MeCN (2.0 mL) was added. The vessel was cooled to 0 °C, and dodecanethiol (20 μL; 0.2 mmol) was added under a countercurrent of N<sub>2</sub>. The resulting suspension was stirred at 0 °C for 10 minutes, and then room temperature for an additional 30 minutes. **2•MeCl** (10.0 mg; 0.027 mmol) was added under a countercurrent of N<sub>2</sub>, and the resulting mixture was stirred at room temperature for 16 hours. 4-fluoro-biphenyl (14.0 mg; 0.08 mmol) was added, an aliquot of the mixture (0.5 mL) was diluted with CD<sub>2</sub>Cl<sub>2</sub> and analyzed by <sup>19</sup>F NMR. The desired product (**29**) was observed in 95% yield. <sup>19</sup>F NMR (CD<sub>2</sub>Cl<sub>2</sub>, 376.5 MHz, δ): -41.2 (s). Spectral data are in agreement with literature reports.<sup>15</sup>

In a separate experiment, a 1 dram vial was charged with dodecanethiol (10.1 mg, 0.050 mmol), **2•MeCl** (18.3 mg, 0.050 mmol), p-fluorobiphenyl (25.8 mg, 0.15 mmol), and a stir bar. The reactants were dissolved in CD<sub>3</sub>CN (1.0 mL) and stirred at room temperature for 16 hours. No formation of the desired product was observed by <sup>19</sup>F NMR.

### Trifluoromethylation of p-toluenesulfonate

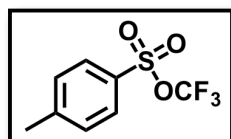

A 1 dram vial was charged with sodium p-toluenesulfonate (9.7 mg, 0.050 mmol), **2•MeCl** (18.3 mg, 0.050 mmol), p-fluorobiphenyl (25.8 mg, 0.15 mmol), and a stir bar. The solids were suspended in CD<sub>2</sub>Cl<sub>2</sub> (1.0 mL) and stirred at room temperature for 16 hours. The reaction mixture was filtered through a plug of celite and analyzed by <sup>19</sup>F NMR, which indicated that the desired product (**31**) was formed in 70% yield. <sup>19</sup>F NMR (CD<sub>2</sub>Cl<sub>2</sub>, 376.5 MHz, δ): -53.6 (s). Spectral data were in agreement with previous reports.<sup>16</sup>

In a separate experiment, a 1 dram vial was charged with p-toluenesulfonic acid monohydrate (9.5 mg, 0.050 mmol), **2•MeCl** (18.3 mg, 0.050 mmol), p-fluorobiphenyl (25.8 mg, 0.15 mmol), and a stir bar. The solids were suspended in CD<sub>2</sub>Cl<sub>2</sub> (1.0 mL) and stirred at room temperature for 16 hours. The reaction mixture was analyzed by <sup>19</sup>F NMR, which indicated that **31** was formed in 78% yield.

*NMR spectra*

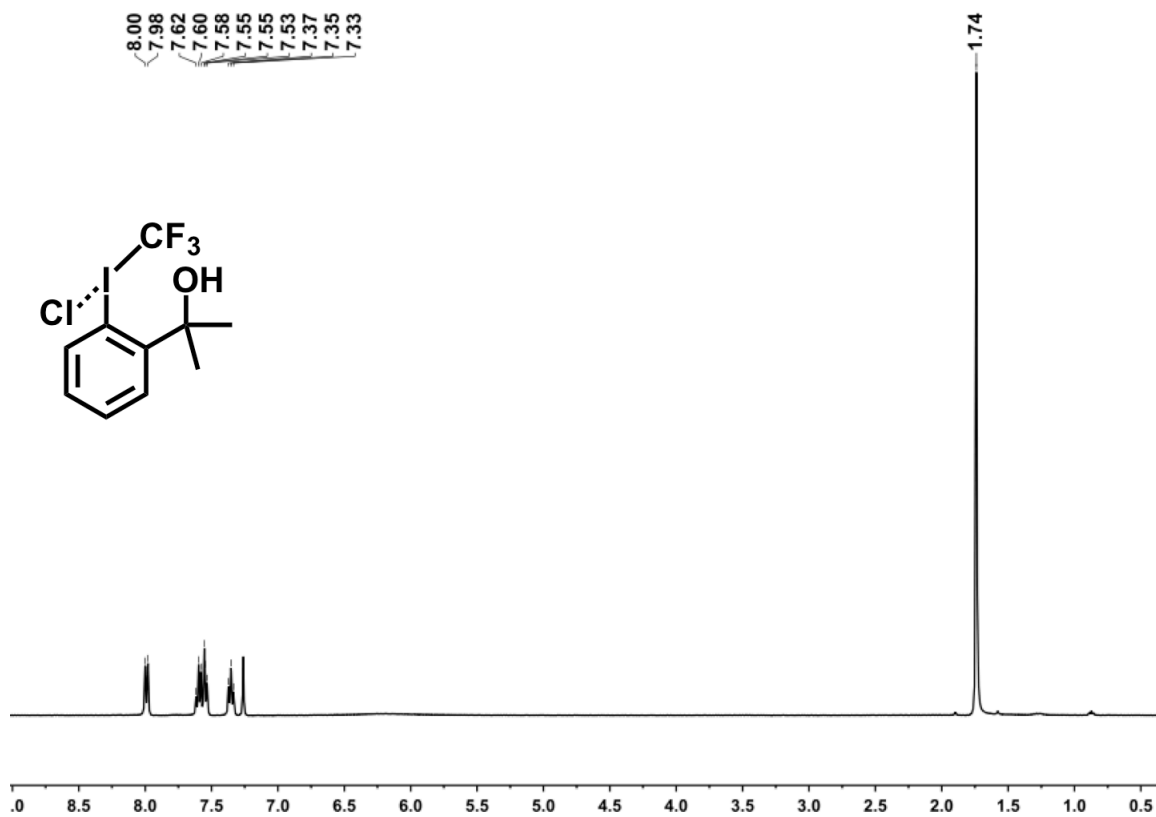

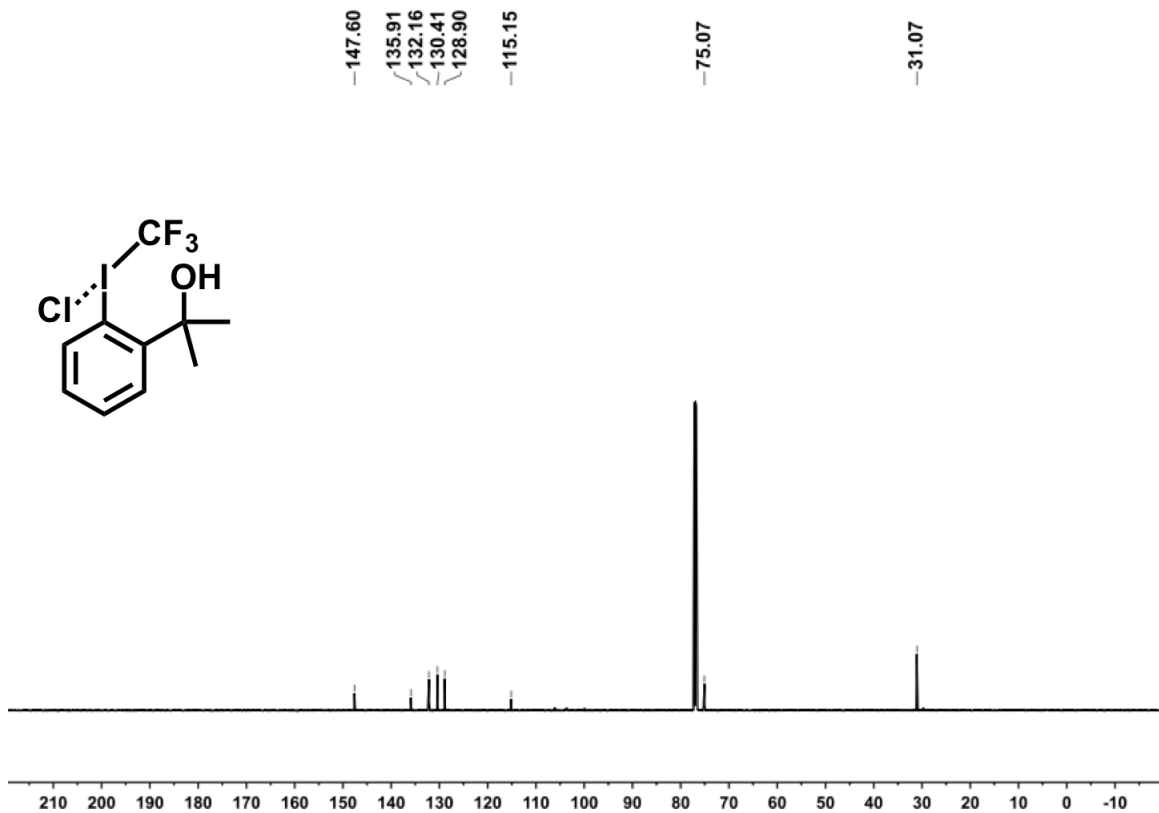

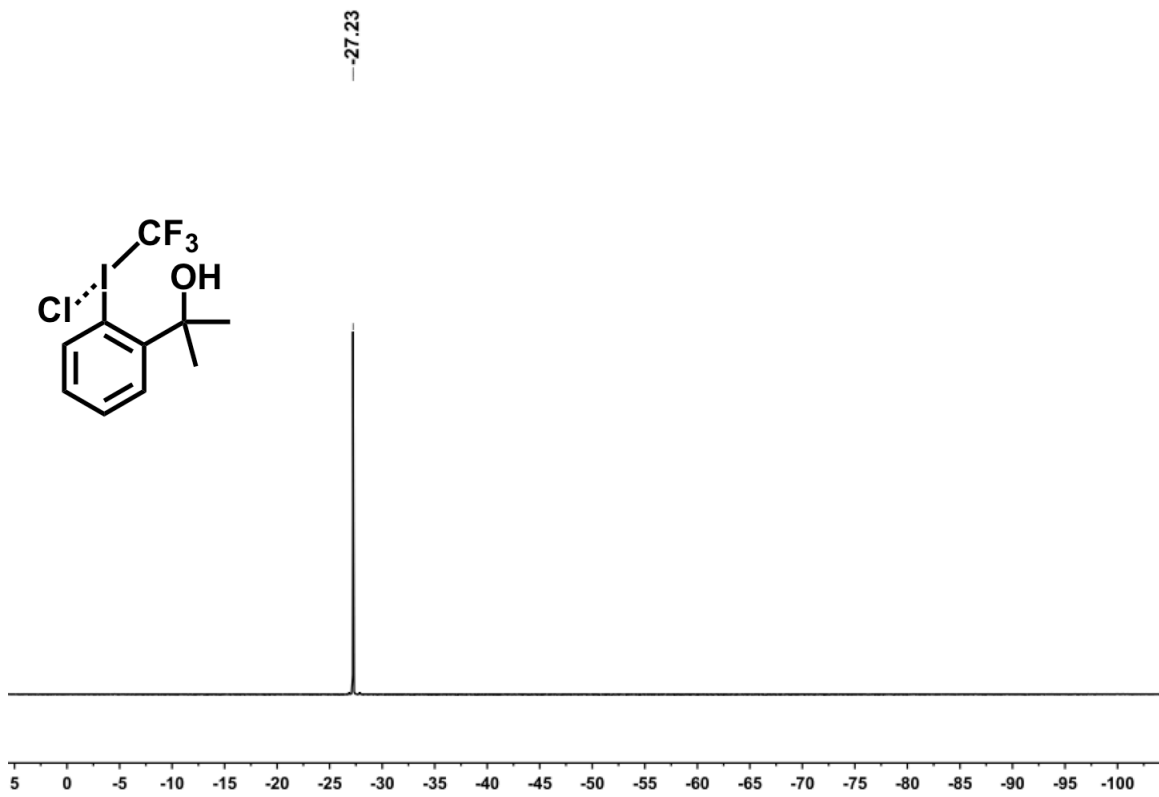



8.50  
8.49  
8.24  
8.23  
8.22  
8.22  
7.85  
7.84  
7.76  
7.76  
7.75  
7.74  
7.73

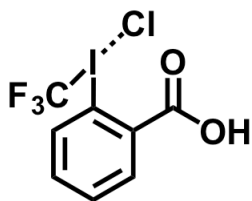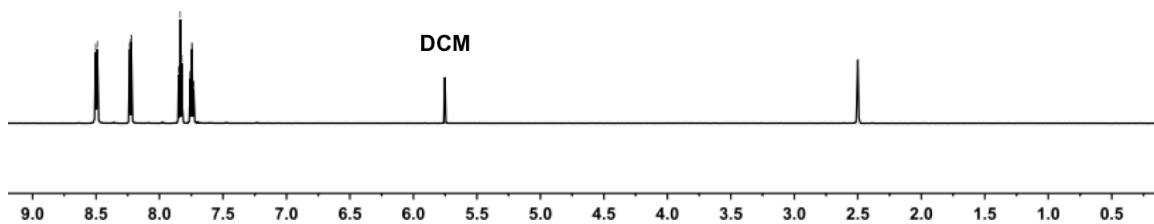

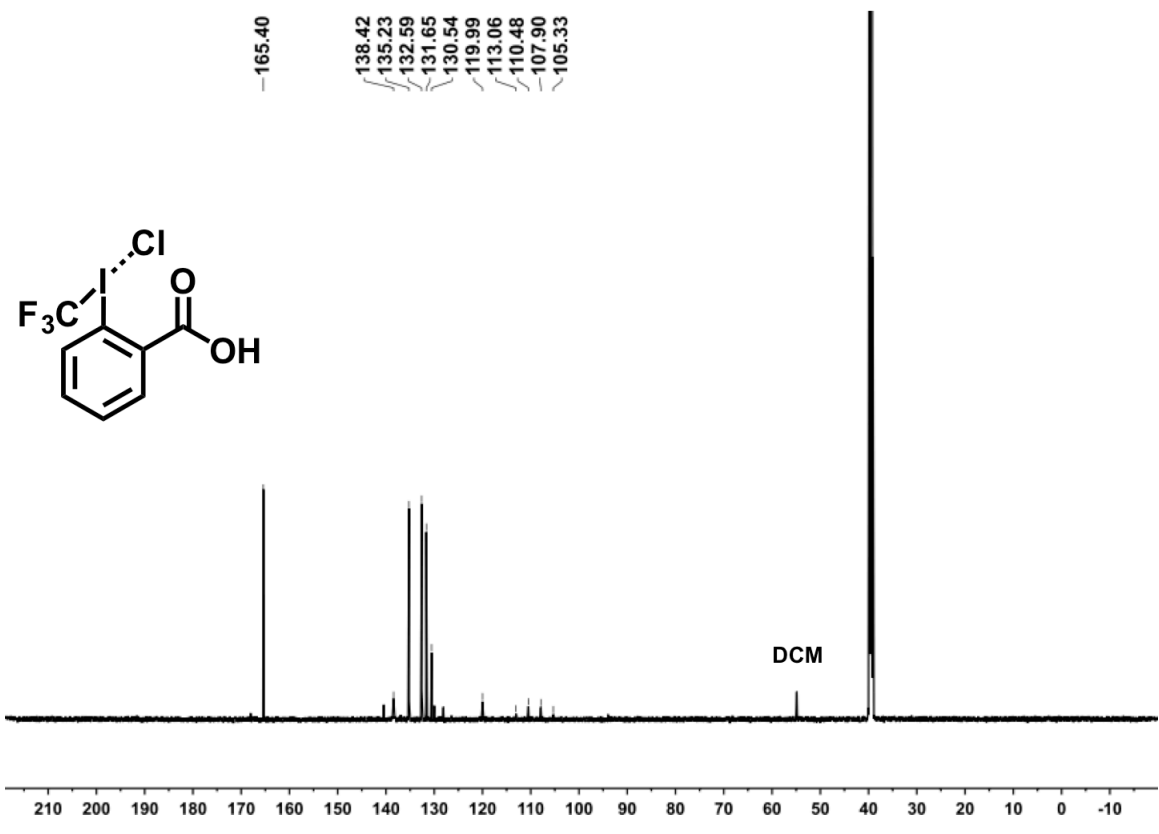

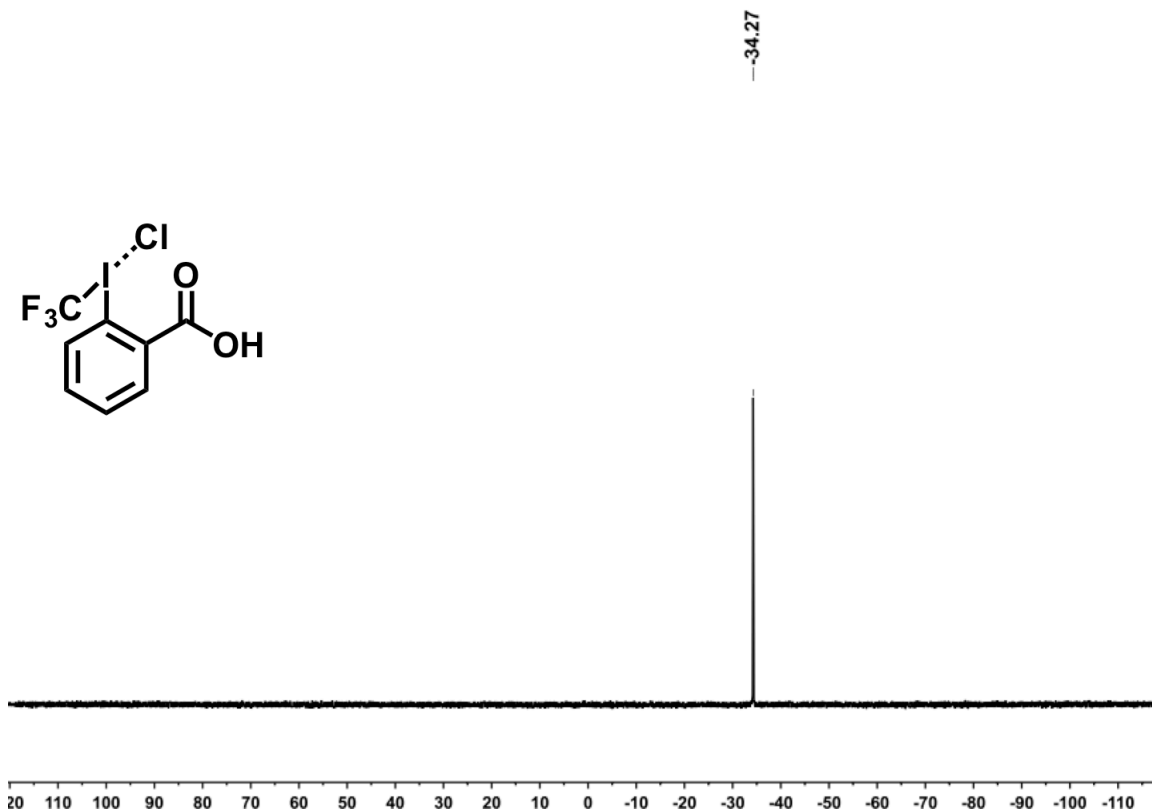

### References

- 1 Maity, A. K.; Roy, S. Multimetallic iridium-tin (Ir-Sn<sub>3</sub>) catalyst in N-acyliminium ion chemistry: synthesis of 3-substituted isoindolinones via intra- and intermolecular amidoalkylation reaction. *Adv. Synth. Catal.* **2014**, *356*, 2627-2642.
- 2 Winston, M. S.; Wolf, W. J.; Toste, F. D. Halide-dependent mechanisms of reductive elimination from gold(III). *J. Am. Chem. Soc.* **2015**, *137*, 7921-7928.
- 3 Yakelis, N. A.; Bergman, R. G. Safe preparation and purification of sodium tetrakis[(3,5-trifluoromethyl)phenyl]borate (NaBARF<sub>24</sub>): reliable and sensitive analysis of water in solutions of fluorinated tetraarylborates. *Organometallics* **2005**, *24*, 3579-3581.
- 4 Kuehl, C. J.; Bolz, J. T.; Zhdankin, V. V. [Hydroxy(sulfonyloxy)iodo]perfluoroalkanes: new and convenient reagents for the preparation of fluoroalkyl(aryl)iodonium salts. *Synthesis* **1995**, *1995*, 312-316.
- 5 Gaussian 09, Revision D.01, Frisch, M. J.; Trucks, G. W.; Schlegel, H. B.; Scuseria, G. E.; Robb, M. A.; Cheeseman, J. R.; Scalmani, G.; Barone, V.; Mennucci, B.; Petersson, G. A.; Nakatsuji, H.; Caricato, M.; Li, X.; Hratchian, H. P.; Izmaylov, A. F.; Bloino, J.; Zheng, G.; Sonnenberg, J. L.; Hada, M.; Ehara, M.; Toyota, K.; Fukuda, R.; Hasegawa, J.; Ishida, M.; Nakajima, T.; Honda, Y.; Kitao, O.; Nakai, H.; Vreven, T.; Montgomery, J. A., Jr.; Peralta, J. E.; Ogliaro, F.; Bearpark, M.; Heyd, J. J.; Brothers, E.; Kudin, K. N.; Staroverov, V. N.; Kobayashi, R.; Normand, J.; Raghavachari, K.; Rendell, A.; Burant, J. C.; Iyengar, S. S.; Tomasi, J.; Cossi, M.; Rega, N.; Millam, J. M.; Klene, M.; Knox, J. E.;

- Cross, J. B.; Bakken, V.; Adamo, C.; Jaramillo, J.; Gomperts, R.; Stratmann, R. E.; Yazyev, O.; Austin, A. J.; Cammi, R.; Pomelli, C.; Ochterski, J. W.; Martin, R. L.; Morokuma, K.; Zakrzewski, V. G.; Voth, G. A.; Salvador, P.; Dannenberg, J. J.; Dapprich, S.; Daniels, A. D.; Farkas, Ö.; Foresman, J. B.; Ortiz, J. V.; Cioslowski, J.; Fox, D. J. Gaussian, Inc.: Wallingford, CT 2009.
- 6 Kieltch, I.; Eisenberger, P.; Togni, A. Mild electrophilic trifluoromethylation of carbon- and sulfur-centered nucleophiles by a hypervalent iodine(III)-CF<sub>3</sub> reagent. *Angew. Chem. Int. Ed.* **2007**, *46*, 754-757.
- 7 Eisenberger, P.; Gischig, S.; Togni, A. Novel 10-I-3 hypervalent iodine-based compounds for electrophilic trifluoromethylation. *Chem. Eur. J.* **2006**, *12*, 2579-2586.
- 8 Trojánec, A.; Langmaier, J.; Šebera, J.; Záliš, S.; Barbe, J.-M.; Girault, H. H.; Samec, Z. Fine tuning of the catalytic effect of a metal-free porphyrin on the homogeneous oxygen reduction. *Chem. Commun.* **2011**, *47*, 5446-5448.
- 9 Koller, R.; Stanek, K.; Stolz, D.; Aardoom, R.; Niedermann, K.; Togni, A. Zinc-mediated formation of trifluoromethyl ethers from alcohols and hypervalent iodine trifluoromethylation reagents. *Angew. Chem. Int. Ed.* **2009**, *48*, 4332-4336.
- 10 Liu, J.-B.; Xu, X.-H.; Qing, F.-L. Silver-mediated trifluoromethylation of alcohols to alkyl trifluoromethyl ethers. *Org. Lett.* **2015**, *17*, 5048-5051.
- 11 Niedermann, K.; Früh, N.; Senn, R.; Czarniecki, B.; Verel, R.; Togni, A. Direct N-trifluoromethylation of azoles by a hypervalent iodine reagent. *Angew. Chem. Int. Ed.* **2012**, *51*, 6511-6515.
- 12 Engl, P. S.; Senn, R.; Otth, E.; Togni, A. Synthesis and characterization of N-trifluoromethyl N-heterocyclic carbene ligands and their coplexes. *Organometallics* **2015**, *34*, 1384-1395.
- 13 Alkhafaji, H. M. H.; Ryabukhin, D. S.; Muzalevskiy, V. M.; Vasilyev, A. V.; Fukin, G. K.; Shastin, A. V.; Nenajdenko, V. G. Regiocontrolled hydroarylation of (trifluoromethyl)acetylenes in superacids: synthesis of CF<sub>3</sub>-substituted 1,1-diarylethenes. *Eur. J. Org. Chem.* **2013**, *2013*, 1132-1143.
- 14 Umemoto, T.; Ishihara, S. Power-variable electrophilic trifluoromethylating agents. S-, Se-, and Te-(trifluoromethyl)dibenzothio-, -seleno-, and tellurophenium salt system. *J. Am. Chem. Soc.* **1993**, *115*, 2156-2164.
- 15 Lin, Q.; Chen, L.; Huang, Y.; Rong, M.; Yuan, Y.; Weng, Z. Efficient C(sp<sup>3</sup>alkyl)-SCF<sub>3</sub> bond formations via copper-mediated trifluoromethylthiolation of alkyl halides. *Org. Biomol. Chem.* **2014**, *12*, 5500-5508.
- 16 Koller, R.; Huchet, Q.; Battaglia, P.; Welch, J. M.; Togni, A. Acid-mediated formation of trifluoromethyl sulfonates from sulfonic acids and a hypervalent iodine trifluoromethylating agent. *Chem. Commun.* **2009**, *40*, 5993-5995.

Crystallographic data

**Table 1.** Crystal data and structure refinement for **1•HBF<sub>4</sub>**

|                                   |                                             |                 |
|-----------------------------------|---------------------------------------------|-----------------|
| Identification code               | shelx                                       |                 |
| Empirical formula                 | C10 H11 B F7 I O S0                         |                 |
| Formula weight                    | 417.90                                      |                 |
| Temperature                       | 100(2) K                                    |                 |
| Wavelength                        | 0.71073 Å                                   |                 |
| Crystal system                    | Monoclinic                                  |                 |
| Space group                       | P 21/c                                      |                 |
| Unit cell dimensions              | a = 15.9890(9) Å                            | a = 90°.        |
|                                   | b = 8.7606(5) Å                             | b = 93.788(3)°. |
|                                   | c = 19.0524(11) Å                           | g = 90°.        |
| Volume                            | 2662.9(3) Å <sup>3</sup>                    |                 |
| Z                                 | 8                                           |                 |
| Density (calculated)              | 2.085 Mg/m <sup>3</sup>                     |                 |
| Absorption coefficient            | 2.479 mm <sup>-1</sup>                      |                 |
| F(000)                            | 1600                                        |                 |
| Crystal size                      | 0.060 x 0.020 x 0.020 mm <sup>3</sup>       |                 |
| Theta range for data collection   | 1.276 to 25.396°.                           |                 |
| Index ranges                      | -19<=h<=19, -10<=k<=10, -22<=l<=22          |                 |
| Reflections collected             | 75792                                       |                 |
| Independent reflections           | 4884 [R(int) = 0.0489]                      |                 |
| Completeness to theta = 25.000°   | 99.9 %                                      |                 |
| Absorption correction             | Semi-empirical from equivalents             |                 |
| Max. and min. transmission        | 0.745 and 0.688                             |                 |
| Refinement method                 | Full-matrix least-squares on F <sup>2</sup> |                 |
| Data / restraints / parameters    | 4884 / 0 / 361                              |                 |
| Goodness-of-fit on F <sup>2</sup> | 1.092                                       |                 |
| Final R indices [I>2sigma(I)]     | R1 = 0.0480, wR2 = 0.1144                   |                 |
| R indices (all data)              | R1 = 0.0565, wR2 = 0.1200                   |                 |
| Extinction coefficient            | n/a                                         |                 |
| Largest diff. peak and hole       | 3.333 and -1.095 e.Å <sup>-3</sup>          |                 |

**Table 2.** Atomic coordinates ( $\times 10^4$ ) and equivalent isotropic displacement parameters ( $\text{\AA}^2 \times 10^3$ ) for **1•HBF<sub>4</sub>**. U(eq) is defined as one third of the trace of the orthogonalized  $U_{ij}$  tensor.

|       | x        | y        | z       | U(eq) |
|-------|----------|----------|---------|-------|
| C(1)  | 8832(3)  | 1807(6)  | 4500(3) | 21(1) |
| C(2)  | 9612(3)  | 3449(5)  | 5902(3) | 15(1) |
| C(3)  | 10313(3) | 3265(6)  | 5525(3) | 19(1) |
| C(4)  | 11098(3) | 3474(6)  | 5877(3) | 23(1) |
| C(5)  | 11152(3) | 3844(6)  | 6579(3) | 21(1) |
| C(6)  | 10433(3) | 4023(6)  | 6946(3) | 19(1) |
| C(7)  | 9637(3)  | 3855(5)  | 6612(3) | 15(1) |
| C(8)  | 8845(3)  | 4067(6)  | 7008(3) | 17(1) |
| C(9)  | 8551(3)  | 2542(6)  | 7288(3) | 21(1) |
| C(10) | 8948(3)  | 5250(6)  | 7585(3) | 26(1) |
| C(11) | 6198(3)  | 6979(6)  | 5403(3) | 24(1) |
| C(12) | 5379(3)  | 8572(6)  | 4002(3) | 15(1) |
| C(13) | 4673(3)  | 8406(6)  | 4376(3) | 18(1) |
| C(14) | 3895(3)  | 8571(6)  | 4016(3) | 22(1) |
| C(15) | 3841(3)  | 8931(6)  | 3306(3) | 20(1) |
| C(16) | 4571(3)  | 9089(5)  | 2946(3) | 17(1) |
| C(17) | 5360(3)  | 8924(5)  | 3289(3) | 14(1) |
| C(18) | 6160(3)  | 9085(6)  | 2895(2) | 16(1) |
| C(19) | 6050(3)  | 10148(6) | 2263(3) | 22(1) |
| C(20) | 6464(3)  | 7521(6)  | 2678(3) | 19(1) |
| O(1)  | 8182(2)  | 4582(4)  | 6501(2) | 21(1) |
| O(2)  | 6796(2)  | 9716(4)  | 3390(2) | 19(1) |
| F(1)  | 9333(2)  | 708(4)   | 4725(2) | 28(1) |
| F(2)  | 9210(2)  | 2666(4)  | 4049(2) | 30(1) |
| F(3)  | 8148(2)  | 1217(4)  | 4175(2) | 35(1) |
| F(4)  | 5819(2)  | 7761(4)  | 5879(2) | 32(1) |
| F(5)  | 6897(2)  | 6397(4)  | 5696(2) | 38(1) |
| F(6)  | 5703(2)  | 5876(4)  | 5165(2) | 28(1) |
| F(7)  | 8724(2)  | 7222(4)  | 5918(2) | 46(1) |
| F(8)  | 8055(2)  | 8598(5)  | 6700(2) | 48(1) |

|       |         |         |         |       |
|-------|---------|---------|---------|-------|
| F(9)  | 7956(2) | 9266(4) | 5561(2) | 49(1) |
| F(10) | 9180(2) | 9591(4) | 6209(2) | 29(1) |
| F(11) | 5787(2) | 4277(5) | 3838(2) | 51(1) |
| F(12) | 6569(3) | 2538(5) | 4488(2) | 59(1) |
| F(13) | 6780(2) | 2865(4) | 3340(2) | 34(1) |
| F(14) | 7136(2) | 4689(5) | 4134(2) | 56(1) |
| I(1)  | 8407(1) | 3185(1) | 5377(1) | 19(1) |
| I(2)  | 6581(1) | 8451(1) | 4543(1) | 19(1) |
| B(1)  | 8469(4) | 8679(7) | 6099(3) | 19(1) |
| B(2)  | 6553(4) | 3591(7) | 3950(3) | 19(1) |

---

**Table 3.** Crystal data and structure refinement for **5**.

|                                   |                                                        |                    |
|-----------------------------------|--------------------------------------------------------|--------------------|
| Identification code               | shelx                                                  |                    |
| Empirical formula                 | C <sub>12</sub> H <sub>13</sub> Cl F <sub>7</sub> I Si |                    |
| Formula weight                    | 480.66                                                 |                    |
| Temperature                       | 100(2) K                                               |                    |
| Wavelength                        | 0.71073 Å                                              |                    |
| Crystal system                    | Monoclinic                                             |                    |
| Space group                       | P 21/c                                                 |                    |
| Unit cell dimensions              | a = 12.0089(4) Å                                       | a = 90°.           |
|                                   | b = 25.0752(9) Å                                       | b = 115.4650(10)°. |
|                                   | c = 12.5156(4) Å                                       | g = 90°.           |
| Volume                            | 3402.6(2) Å <sup>3</sup>                               |                    |
| Z                                 | 8                                                      |                    |
| Density (calculated)              | 1.877 Mg/m <sup>3</sup>                                |                    |
| Absorption coefficient            | 2.169 mm <sup>-1</sup>                                 |                    |
| F(000)                            | 1856                                                   |                    |
| Crystal size                      | 0.100 x 0.060 x 0.030 mm <sup>3</sup>                  |                    |
| Theta range for data collection   | 1.624 to 25.384°.                                      |                    |
| Index ranges                      | -13 ≤ h ≤ 14, -30 ≤ k ≤ 25, -15 ≤ l ≤ 14               |                    |
| Reflections collected             | 39280                                                  |                    |
| Independent reflections           | 6244 [R(int) = 0.0385]                                 |                    |
| Completeness to theta = 25.000°   | 100.0 %                                                |                    |
| Absorption correction             | Semi-empirical from equivalents                        |                    |
| Max. and min. transmission        | 0.745 and 0.642                                        |                    |
| Refinement method                 | Full-matrix least-squares on F <sup>2</sup>            |                    |
| Data / restraints / parameters    | 6244 / 0 / 403                                         |                    |
| Goodness-of-fit on F <sup>2</sup> | 1.095                                                  |                    |
| Final R indices [I > 2σ(I)]       | R1 = 0.0246, wR2 = 0.0561                              |                    |
| R indices (all data)              | R1 = 0.0263, wR2 = 0.0569                              |                    |
| Extinction coefficient            | n/a                                                    |                    |
| Largest diff. peak and hole       | 1.055 and -0.603 e.Å <sup>-3</sup>                     |                    |



**Table 4.** Atomic coordinates ( $\times 10^4$ ) and equivalent isotropic displacement parameters ( $\text{\AA}^2 \times 10^3$ ) for **5**.  $U(\text{eq})$  is defined as one third of the trace of the orthogonalized  $U^{ij}$  tensor.

|       | x        | y       | z       | U(eq) |
|-------|----------|---------|---------|-------|
| C(1)  | 5766(3)  | 4566(1) | 2339(3) | 22(1) |
| C(2)  | 5770(3)  | 4317(1) | 3453(2) | 24(1) |
| C(3)  | 6833(3)  | 3926(1) | 4144(3) | 29(1) |
| C(4)  | 4840(2)  | 5750(1) | 2147(2) | 19(1) |
| C(5)  | 5528(3)  | 6034(1) | 1703(2) | 22(1) |
| C(6)  | 5982(2)  | 6526(1) | 2198(2) | 22(1) |
| C(7)  | 5767(2)  | 6740(1) | 3128(2) | 18(1) |
| C(8)  | 5072(3)  | 6427(1) | 3549(2) | 24(1) |
| C(9)  | 4601(3)  | 5934(1) | 3067(2) | 23(1) |
| C(10) | 5074(3)  | 7738(1) | 4059(3) | 28(1) |
| C(11) | 6564(3)  | 7818(1) | 2609(2) | 25(1) |
| C(12) | 7744(3)  | 7376(1) | 5154(2) | 23(1) |
| C(13) | 9032(3)  | 5047(1) | 7518(2) | 22(1) |
| C(14) | 9263(3)  | 5332(1) | 6547(3) | 32(1) |
| C(15) | 8285(3)  | 5745(1) | 5811(3) | 41(1) |
| C(16) | 9959(2)  | 3850(1) | 7736(2) | 19(1) |
| C(17) | 10542(3) | 3639(1) | 7092(2) | 25(1) |
| C(18) | 10160(3) | 3143(1) | 6570(3) | 26(1) |
| C(19) | 9208(2)  | 2859(1) | 6673(2) | 19(1) |
| C(20) | 8633(3)  | 3103(1) | 7311(2) | 21(1) |
| C(21) | 8998(2)  | 3595(1) | 7858(2) | 20(1) |
| C(22) | 8392(3)  | 1774(1) | 7116(3) | 27(1) |
| C(23) | 7375(3)  | 2208(1) | 4582(3) | 26(1) |
| C(24) | 10078(3) | 1856(1) | 5872(3) | 27(1) |
| F(1)  | 5833(2)  | 4186(1) | 1622(1) | 31(1) |
| F(2)  | 6743(2)  | 4891(1) | 2629(2) | 37(1) |
| F(3)  | 4712(2)  | 4050(1) | 3156(2) | 36(1) |
| F(4)  | 5801(2)  | 4710(1) | 4191(2) | 46(1) |
| F(5)  | 6684(2)  | 3483(1) | 3541(2) | 48(1) |
| F(6)  | 6816(2)  | 3805(1) | 5160(2) | 48(1) |

|       |          |         |          |        |
|-------|----------|---------|----------|--------|
| F(7)  | 7898(2)  | 4134(1) | 4339(2)  | 66(1)  |
| F(8)  | 8028(2)  | 4738(1) | 7014(2)  | 32(1)  |
| F(9)  | 8834(2)  | 5408(1) | 8202(2)  | 29(1)  |
| F(10) | 9326(3)  | 4963(1) | 5806(2)  | 61(1)  |
| F(11) | 10345(2) | 5585(1) | 7043(2)  | 51(1)  |
| F(12) | 7194(3)  | 5539(1) | 5370(3)  | 115(2) |
| F(13) | 8289(3)  | 6150(1) | 6458(2)  | 71(1)  |
| F(14) | 8517(3)  | 5933(1) | 4956(2)  | 88(1)  |
| Si(1) | 6314(1)  | 7428(1) | 3752(1)  | 18(1)  |
| Si(2) | 8755(1)  | 2163(1) | 6044(1)  | 19(1)  |
| Cl(1) | 1907(1)  | 5619(1) | 120(1)   | 23(1)  |
| Cl(2) | 12729(1) | 3954(1) | 10090(1) | 23(1)  |
| I(1)  | 4010(1)  | 5027(1) | 1326(1)  | 18(1)  |
| I(2)  | 10681(1) | 4561(1) | 8686(1)  | 18(1)  |

---

**Table 5.** Crystal data and structure refinement for **2•HCl**.

|                                   |                                                                                          |                    |
|-----------------------------------|------------------------------------------------------------------------------------------|--------------------|
| Identification code               | shelx                                                                                    |                    |
| Empirical formula                 | C <sub>8.50</sub> H <sub>5.75</sub> Cl F <sub>3</sub> I N <sub>0.25</sub> O <sub>2</sub> |                    |
| Formula weight                    | 362.73                                                                                   |                    |
| Temperature                       | 100(2) K                                                                                 |                    |
| Wavelength                        | 0.71073 Å                                                                                |                    |
| Crystal system                    | Monoclinic                                                                               |                    |
| Space group                       | C c                                                                                      |                    |
| Unit cell dimensions              | a = 18.8002(13) Å                                                                        | a = 90°.           |
|                                   | b = 16.2335(11) Å                                                                        | b = 108.8840(10)°. |
|                                   | c = 15.7805(11) Å                                                                        | g = 90°.           |
| Volume                            | 4556.9(5) Å <sup>3</sup>                                                                 |                    |
| Z                                 | 16                                                                                       |                    |
| Density (calculated)              | 2.115 Mg/m <sup>3</sup>                                                                  |                    |
| Absorption coefficient            | 3.067 mm <sup>-1</sup>                                                                   |                    |
| F(000)                            | 2744                                                                                     |                    |
| Crystal size                      | 0.200 x 0.100 x 0.080 mm <sup>3</sup>                                                    |                    |
| Theta range for data collection   | 1.698 to 25.437°.                                                                        |                    |
| Index ranges                      | -22<=h<=22, -19<=k<=19, -19<=l<=19                                                       |                    |
| Reflections collected             | 52041                                                                                    |                    |
| Independent reflections           | 8303 [R(int) = 0.0373]                                                                   |                    |
| Completeness to theta = 25.000°   | 100.0 %                                                                                  |                    |
| Absorption correction             | Semi-empirical from equivalents                                                          |                    |
| Max. and min. transmission        | 0.7452 and 0.5911                                                                        |                    |
| Refinement method                 | Full-matrix least-squares on F <sup>2</sup>                                              |                    |
| Data / restraints / parameters    | 8303 / 2 / 573                                                                           |                    |
| Goodness-of-fit on F <sup>2</sup> | 1.126                                                                                    |                    |
| Final R indices [I>2sigma(I)]     | R1 = 0.0280, wR2 = 0.0684                                                                |                    |
| R indices (all data)              | R1 = 0.0291, wR2 = 0.0692                                                                |                    |
| Absolute structure parameter      | -0.040(6)                                                                                |                    |
| Extinction coefficient            | n/a                                                                                      |                    |
| Largest diff. peak and hole       | 1.879 and -0.897 e.Å <sup>-3</sup>                                                       |                    |

**Table 6.** Atomic coordinates ( $\times 10^4$ ) and equivalent isotropic displacement parameters ( $\text{\AA}^2 \times 10^3$ ) for **2•HCl**.  $U(\text{eq})$  is defined as one third of the trace of the orthogonalized  $U_{ij}$  tensor.

|       | x       | y        | z       | $U(\text{eq})$ |
|-------|---------|----------|---------|----------------|
| C(1)  | 4580(5) | 11347(5) | 6673(6) | 21(2)          |
| C(2)  | 3799(4) | 9978(5)  | 7410(5) | 17(2)          |
| C(3)  | 3893(5) | 10038(5) | 8311(5) | 22(2)          |
| C(4)  | 4145(5) | 9356(5)  | 8858(5) | 25(2)          |
| C(5)  | 4297(5) | 8623(5)  | 8493(6) | 27(2)          |
| C(6)  | 4183(4) | 8575(5)  | 7585(5) | 21(2)          |
| C(7)  | 3924(4) | 9247(5)  | 7017(5) | 18(2)          |
| C(8)  | 3791(5) | 9169(5)  | 6032(6) | 22(2)          |
| C(9)  | 5510(5) | 8627(6)  | 5081(6) | 25(2)          |
| C(10) | 6592(5) | 7459(5)  | 4471(5) | 19(2)          |
| C(11) | 6630(5) | 6641(5)  | 4737(6) | 21(2)          |
| C(12) | 6661(5) | 6033(5)  | 4143(6) | 25(2)          |
| C(13) | 6645(6) | 6254(5)  | 3297(6) | 29(2)          |
| C(14) | 6603(5) | 7061(5)  | 3023(6) | 22(2)          |
| C(15) | 6559(4) | 7690(4)  | 3609(5) | 15(2)          |
| C(16) | 6519(5) | 8567(5)  | 3323(6) | 21(2)          |
| C(17) | 4448(5) | 6101(5)  | 3846(6) | 25(2)          |
| C(18) | 3387(4) | 4870(5)  | 2503(6) | 18(2)          |
| C(19) | 3401(5) | 4956(5)  | 1639(6) | 24(2)          |
| C(20) | 3427(5) | 4251(6)  | 1155(6) | 24(2)          |
| C(21) | 3411(5) | 3486(6)  | 1511(6) | 27(2)          |
| C(22) | 3393(5) | 3419(5)  | 2385(6) | 19(2)          |
| C(23) | 3391(4) | 4108(5)  | 2900(5) | 16(2)          |
| C(24) | 3398(4) | 4001(4)  | 3869(5) | 12(2)          |
| C(25) | 5615(5) | 3692(6)  | 2650(6) | 29(2)          |
| C(26) | 6593(5) | 2467(5)  | 4083(5) | 18(2)          |
| C(27) | 6451(5) | 1672(5)  | 3766(6) | 22(2)          |
| C(28) | 6353(5) | 1064(5)  | 4342(6) | 24(2)          |
| C(29) | 6426(5) | 1253(5)  | 5210(6) | 24(2)          |
| C(30) | 6585(5) | 2066(5)  | 5517(6) | 21(2)          |

|       |         |          |         |       |
|-------|---------|----------|---------|-------|
| C(31) | 6666(4) | 2687(5)  | 4957(5) | 15(2) |
| C(32) | 6766(5) | 3555(5)  | 5281(6) | 20(2) |
| C(33) | 5035(5) | 3603(6)  | 5440(6) | 26(2) |
| C(34) | 5079(6) | 4222(7)  | 6114(8) | 43(3) |
| O(1)  | 3819(4) | 9718(3)  | 5544(4) | 26(1) |
| O(2)  | 3648(3) | 8382(3)  | 5771(4) | 22(1) |
| O(3)  | 6360(4) | 9122(3)  | 3761(4) | 26(1) |
| O(4)  | 6619(3) | 8679(3)  | 2548(4) | 21(1) |
| O(5)  | 3565(4) | 4560(3)  | 4392(4) | 26(1) |
| O(6)  | 3227(4) | 3249(3)  | 4020(4) | 24(1) |
| O(7)  | 6651(5) | 4124(4)  | 4768(5) | 41(2) |
| O(8)  | 6944(3) | 3629(4)  | 6149(4) | 22(1) |
| F(1)  | 4864(3) | 11969(3) | 7219(4) | 28(1) |
| F(2)  | 4574(3) | 11536(3) | 5860(3) | 28(1) |
| F(3)  | 5010(3) | 10696(3) | 6956(4) | 29(1) |
| F(4)  | 5419(3) | 9434(3)  | 5018(3) | 30(1) |
| F(5)  | 5205(3) | 8352(4)  | 5671(4) | 39(1) |
| F(6)  | 5155(3) | 8300(3)  | 4292(4) | 30(1) |
| F(7)  | 4742(3) | 6685(3)  | 3496(4) | 39(1) |
| F(8)  | 4561(3) | 6286(4)  | 4695(4) | 36(1) |
| F(9)  | 4787(3) | 5395(3)  | 3809(4) | 35(1) |
| F(10) | 5557(3) | 4498(3)  | 2766(4) | 41(1) |
| F(11) | 5339(3) | 3548(4)  | 1793(4) | 44(2) |
| F(12) | 5226(3) | 3318(4)  | 3071(5) | 47(2) |
| Cl(1) | 1951(1) | 10453(1) | 6742(1) | 18(1) |
| Cl(2) | 8301(1) | 7848(1)  | 5948(1) | 18(1) |
| Cl(3) | 1666(1) | 5515(1)  | 2015(1) | 18(1) |
| Cl(4) | 8344(1) | 2751(1)  | 3879(1) | 20(1) |
| I(1)  | 3433(1) | 11070(1) | 6674(1) | 16(1) |
| I(2)  | 6712(1) | 8313(1)  | 5527(1) | 15(1) |
| I(3)  | 3238(1) | 5990(1)  | 3110(1) | 16(1) |
| I(4)  | 6804(1) | 3305(1)  | 3157(1) | 16(1) |
| N(1)  | 4993(5) | 3120(5)  | 4904(6) | 37(2) |

---

**Table 7.** Crystal data and structure refinement for **1•HCl**.

|                                   |                                                       |                    |
|-----------------------------------|-------------------------------------------------------|--------------------|
| Identification code               | shelx                                                 |                    |
| Empirical formula                 | C <sub>10</sub> H <sub>11</sub> Cl F <sub>3</sub> I O |                    |
| Formula weight                    | 366.54                                                |                    |
| Temperature                       | 100(2) K                                              |                    |
| Wavelength                        | 0.71073 Å                                             |                    |
| Crystal system                    | Monoclinic                                            |                    |
| Space group                       | P 21/n                                                |                    |
| Unit cell dimensions              | a = 8.1777(4) Å                                       | a = 90°.           |
|                                   | b = 17.9834(8) Å                                      | b = 115.8250(10)°. |
|                                   | c = 8.8898(4) Å                                       | g = 90°.           |
| Volume                            | 1176.79(9) Å <sup>3</sup>                             |                    |
| Z                                 | 4                                                     |                    |
| Density (calculated)              | 2.069 Mg/m <sup>3</sup>                               |                    |
| Absorption coefficient            | 2.963 mm <sup>-1</sup>                                |                    |
| F(000)                            | 704                                                   |                    |
| Crystal size                      | 0.100 x 0.080 x 0.040 mm <sup>3</sup>                 |                    |
| Theta range for data collection   | 2.265 to 25.379°.                                     |                    |
| Index ranges                      | -9<=h<=9, -21<=k<=21, -10<=l<=10                      |                    |
| Reflections collected             | 23541                                                 |                    |
| Independent reflections           | 2156 [R(int) = 0.0482]                                |                    |
| Completeness to theta = 25.000°   | 99.9 %                                                |                    |
| Absorption correction             | Semi-empirical from equivalents                       |                    |
| Max. and min. transmission        | 0.745 and 0.590                                       |                    |
| Refinement method                 | Full-matrix least-squares on F <sup>2</sup>           |                    |
| Data / restraints / parameters    | 2156 / 0 / 148                                        |                    |
| Goodness-of-fit on F <sup>2</sup> | 1.319                                                 |                    |
| Final R indices [I>2sigma(I)]     | R1 = 0.0376, wR2 = 0.0784                             |                    |
| R indices (all data)              | R1 = 0.0401, wR2 = 0.0793                             |                    |
| Extinction coefficient            | n/a                                                   |                    |
| Largest diff. peak and hole       | 0.993 and -0.655 e.Å <sup>-3</sup>                    |                    |

**Table 8.** Atomic coordinates ( $\times 10^4$ ) and equivalent isotropic displacement parameters ( $\text{\AA}^2 \times 10^3$ ) for **1•HCl**.  $U(\text{eq})$  is defined as one third of the trace of the orthogonalized  $U_{ij}$  tensor.

|       | x        | y       | z       | $U(\text{eq})$ |
|-------|----------|---------|---------|----------------|
| C(1)  | 3452(7)  | 3390(3) | 4385(7) | 13(1)          |
| C(2)  | 4181(8)  | 3899(3) | 5731(7) | 14(1)          |
| C(3)  | 6049(8)  | 3950(3) | 6508(7) | 18(1)          |
| C(4)  | 7160(8)  | 3553(3) | 5979(7) | 20(1)          |
| C(5)  | 6411(8)  | 3074(4) | 4616(7) | 20(1)          |
| C(6)  | 4544(8)  | 2996(3) | 3824(7) | 18(1)          |
| C(7)  | 3016(8)  | 4374(3) | 6307(7) | 17(1)          |
| C(8)  | 2262(8)  | 3912(3) | 7322(7) | 16(1)          |
| C(9)  | 4062(10) | 5045(4) | 7369(8) | 26(2)          |
| O(1)  | 1531(6)  | 4653(2) | 4827(5) | 22(1)          |
| I(1)  | 657(1)   | 3129(1) | 3067(1) | 13(1)          |
| F(1)  | -968(5)  | 4503(2) | 1099(4) | 27(1)          |
| F(2)  | 1853(5)  | 4399(2) | 1658(4) | 28(1)          |
| F(3)  | -134(5)  | 3726(2) | -263(4) | 25(1)          |
| C(10) | 308(8)   | 4022(3) | 1232(7) | 18(1)          |
| Cl(1) | 1541(2)  | 2018(1) | 5558(2) | 19(1)          |

**Table 9.** Crystal data and structure refinement for **1•AcCl**

|                                   |                                                                    |                 |
|-----------------------------------|--------------------------------------------------------------------|-----------------|
| Identification code               | shelx                                                              |                 |
| Empirical formula                 | C <sub>12</sub> H <sub>13</sub> Cl F <sub>3</sub> I O <sub>2</sub> |                 |
| Formula weight                    | 408.57                                                             |                 |
| Temperature                       | 100(2) K                                                           |                 |
| Wavelength                        | 0.71073 Å                                                          |                 |
| Crystal system                    | Monoclinic                                                         |                 |
| Space group                       | P 21/c                                                             |                 |
| Unit cell dimensions              | a = 11.2059(11) Å                                                  | a = 90°.        |
|                                   | b = 13.8263(13) Å                                                  | b = 94.868(2)°. |
|                                   | c = 9.0501(9) Å                                                    | g = 90°.        |
| Volume                            | 1397.1(2) Å <sup>3</sup>                                           |                 |
| Z                                 | 4                                                                  |                 |
| Density (calculated)              | 1.942 Mg/m <sup>3</sup>                                            |                 |
| Absorption coefficient            | 2.512 mm <sup>-1</sup>                                             |                 |
| F(000)                            | 792                                                                |                 |
| Crystal size                      | 0.200 x 0.080 x 0.080 mm <sup>3</sup>                              |                 |
| Theta range for data collection   | 1.824 to 25.388°.                                                  |                 |
| Index ranges                      | -13<=h<=13, -16<=k<=16, -10<=l<=10                                 |                 |
| Reflections collected             | 53119                                                              |                 |
| Independent reflections           | 2574 [R(int) = 0.0503]                                             |                 |
| Completeness to theta = 25.000°   | 100.0 %                                                            |                 |
| Absorption correction             | Semi-empirical from equivalents                                    |                 |
| Max. and min. transmission        | 0.8620 and 0.7420                                                  |                 |
| Refinement method                 | Full-matrix least-squares on F <sup>2</sup>                        |                 |
| Data / restraints / parameters    | 2574 / 0 / 175                                                     |                 |
| Goodness-of-fit on F <sup>2</sup> | 1.138                                                              |                 |
| Final R indices [I>2sigma(I)]     | R1 = 0.0262, wR2 = 0.0623                                          |                 |
| R indices (all data)              | R1 = 0.0300, wR2 = 0.0647                                          |                 |
| Extinction coefficient            | n/a                                                                |                 |
| Largest diff. peak and hole       | 1.774 and -0.361 e.Å <sup>-3</sup>                                 |                 |



**Table 10.** Atomic coordinates ( $\times 10^4$ ) and equivalent isotropic displacement parameters ( $\text{\AA}^2 \times 10^3$ ) for **1•AcCl**.  $U(\text{eq})$  is defined as one third of the trace of the orthogonalized  $U_{ij}$  tensor.

|       | x       | y       | z       | $U(\text{eq})$ |
|-------|---------|---------|---------|----------------|
| C(1)  | 6728(3) | 3710(2) | 3150(3) | 14(1)          |
| C(2)  | 5648(3) | 3222(2) | 3008(3) | 16(1)          |
| C(3)  | 4921(3) | 3271(2) | 1692(4) | 17(1)          |
| C(4)  | 5311(3) | 3808(2) | 532(3)  | 16(1)          |
| C(5)  | 6402(3) | 4293(2) | 705(3)  | 16(1)          |
| C(6)  | 7150(3) | 4281(2) | 2025(3) | 14(1)          |
| C(7)  | 8328(3) | 4849(2) | 2108(3) | 15(1)          |
| C(8)  | 8477(3) | 5480(2) | 753(3)  | 20(1)          |
| C(9)  | 9422(3) | 4202(2) | 2323(4) | 18(1)          |
| C(10) | 6731(3) | 4593(2) | 6286(3) | 18(1)          |
| C(11) | 7728(3) | 6253(2) | 3512(4) | 23(1)          |
| C(12) | 8155(4) | 6876(3) | 4802(4) | 33(1)          |
| F(1)  | 6227(2) | 5195(1) | 5267(2) | 21(1)          |
| F(2)  | 7468(2) | 5109(1) | 7206(2) | 23(1)          |
| F(3)  | 5872(2) | 4233(1) | 7043(2) | 26(1)          |
| Cl(1) | 8615(1) | 1883(1) | 3526(1) | 19(1)          |
| I(1)  | 7690(1) | 3415(1) | 5232(1) | 14(1)          |
| O(1)  | 6892(2) | 6444(2) | 2629(3) | 26(1)          |
| O(2)  | 8412(2) | 5460(2) | 3476(2) | 19(1)          |

**Table 11.** Crystal data and structure refinement for **2•MeCl**.

|                                   |                                                                  |                                           |
|-----------------------------------|------------------------------------------------------------------|-------------------------------------------|
| Identification code               | AVS7020                                                          |                                           |
| Empirical formula                 | C <sub>9</sub> H <sub>7</sub> Cl F <sub>3</sub> I O <sub>2</sub> |                                           |
| Formula weight                    | 366.50                                                           |                                           |
| Temperature                       | 100(2) K                                                         |                                           |
| Wavelength                        | 0.71073 Å                                                        |                                           |
| Crystal system                    | Monoclinic                                                       |                                           |
| Space group                       | P 21/c                                                           |                                           |
| Unit cell dimensions              | a = 6.4617(2) Å<br>b = 18.6546(7) Å<br>c = 9.1924(4) Å           | a = 90°.<br>b = 94.8330(10)°.<br>g = 90°. |
| Volume                            | 1104.12(7) Å <sup>3</sup>                                        |                                           |
| Z                                 | 4                                                                |                                           |
| Density (calculated)              | 2.205 Mg/m <sup>3</sup>                                          |                                           |
| Absorption coefficient            | 3.165 mm <sup>-1</sup>                                           |                                           |
| F(000)                            | 696                                                              |                                           |
| Crystal size                      | 0.160 x 0.160 x 0.040 mm <sup>3</sup>                            |                                           |
| Theta range for data collection   | 2.183 to 25.352°.                                                |                                           |
| Index ranges                      | -7 ≤ h ≤ 7, -22 ≤ k ≤ 20, -11 ≤ l ≤ 9                            |                                           |
| Reflections collected             | 8551                                                             |                                           |
| Independent reflections           | 2004 [R(int) = 0.0785]                                           |                                           |
| Completeness to theta = 25.000°   | 99.8 %                                                           |                                           |
| Absorption correction             | Semi-empirical from equivalents                                  |                                           |
| Max. and min. transmission        | 0.490 and 0.388                                                  |                                           |
| Refinement method                 | Full-matrix least-squares on F <sup>2</sup>                      |                                           |
| Data / restraints / parameters    | 2004 / 0 / 146                                                   |                                           |
| Goodness-of-fit on F <sup>2</sup> | 1.059                                                            |                                           |
| Final R indices [I > 2σ(I)]       | R1 = 0.0376, wR2 = 0.0998                                        |                                           |
| R indices (all data)              | R1 = 0.0390, wR2 = 0.1013                                        |                                           |
| Extinction coefficient            | n/a                                                              |                                           |
| Largest diff. peak and hole       | 2.712 and -2.056 e.Å <sup>-3</sup>                               |                                           |

**Table 12.** Atomic coordinates ( $\times 10^4$ ) and equivalent isotropic displacement parameters ( $\text{\AA}^2 \times 10^3$ ) for **2•MeCl**.  $U(\text{eq})$  is defined as one third of the trace of the orthogonalized  $U_{ij}$  tensor.

|       | x        | y       | z       | U(eq) |
|-------|----------|---------|---------|-------|
| C(1)  | 5048(6)  | 6608(2) | 3389(4) | 17(1) |
| C(2)  | 3139(7)  | 6927(2) | 3005(5) | 19(1) |
| C(3)  | 2136(6)  | 6785(2) | 1643(5) | 21(1) |
| C(4)  | 3037(6)  | 6338(2) | 687(4)  | 22(1) |
| C(5)  | 4932(6)  | 6008(2) | 1088(4) | 20(1) |
| C(6)  | 5970(6)  | 6132(2) | 2463(4) | 17(1) |
| C(7)  | 7978(6)  | 5755(2) | 2900(4) | 20(1) |
| C(8)  | 10369(6) | 4889(2) | 2258(5) | 29(1) |
| C(9)  | 4472(6)  | 6101(2) | 6442(4) | 21(1) |
| O(1)  | 9018(5)  | 5846(2) | 4016(3) | 34(1) |
| O(2)  | 8480(4)  | 5286(2) | 1886(3) | 24(1) |
| F(1)  | 2751(4)  | 6408(2) | 6823(4) | 49(1) |
| F(2)  | 3925(4)  | 5590(1) | 5513(3) | 40(1) |
| F(3)  | 5419(4)  | 5799(2) | 7608(3) | 42(1) |
| Cl(1) | 8384(1)  | 7885(1) | 3671(1) | 21(1) |
| I(1)  | 6458(1)  | 6912(1) | 5460(1) | 14(1) |

*DSC and TGA data for 1•HCl*

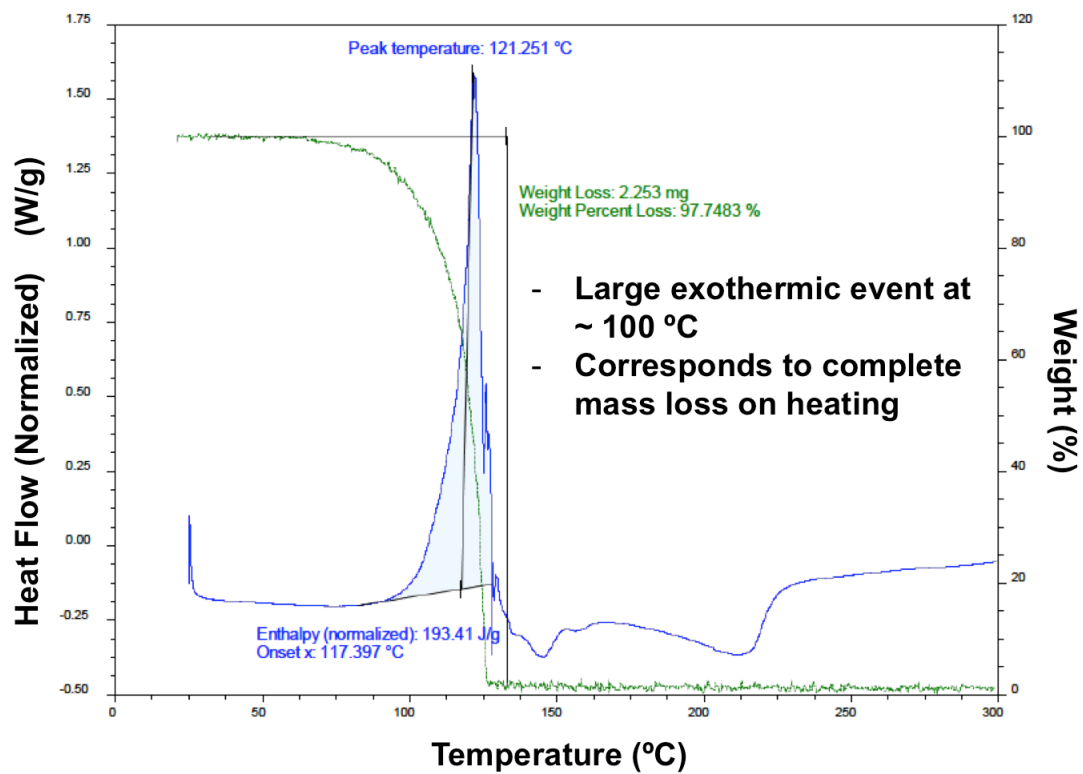

*Cyclic Voltammograms of 1•HCl and 2•HCl*

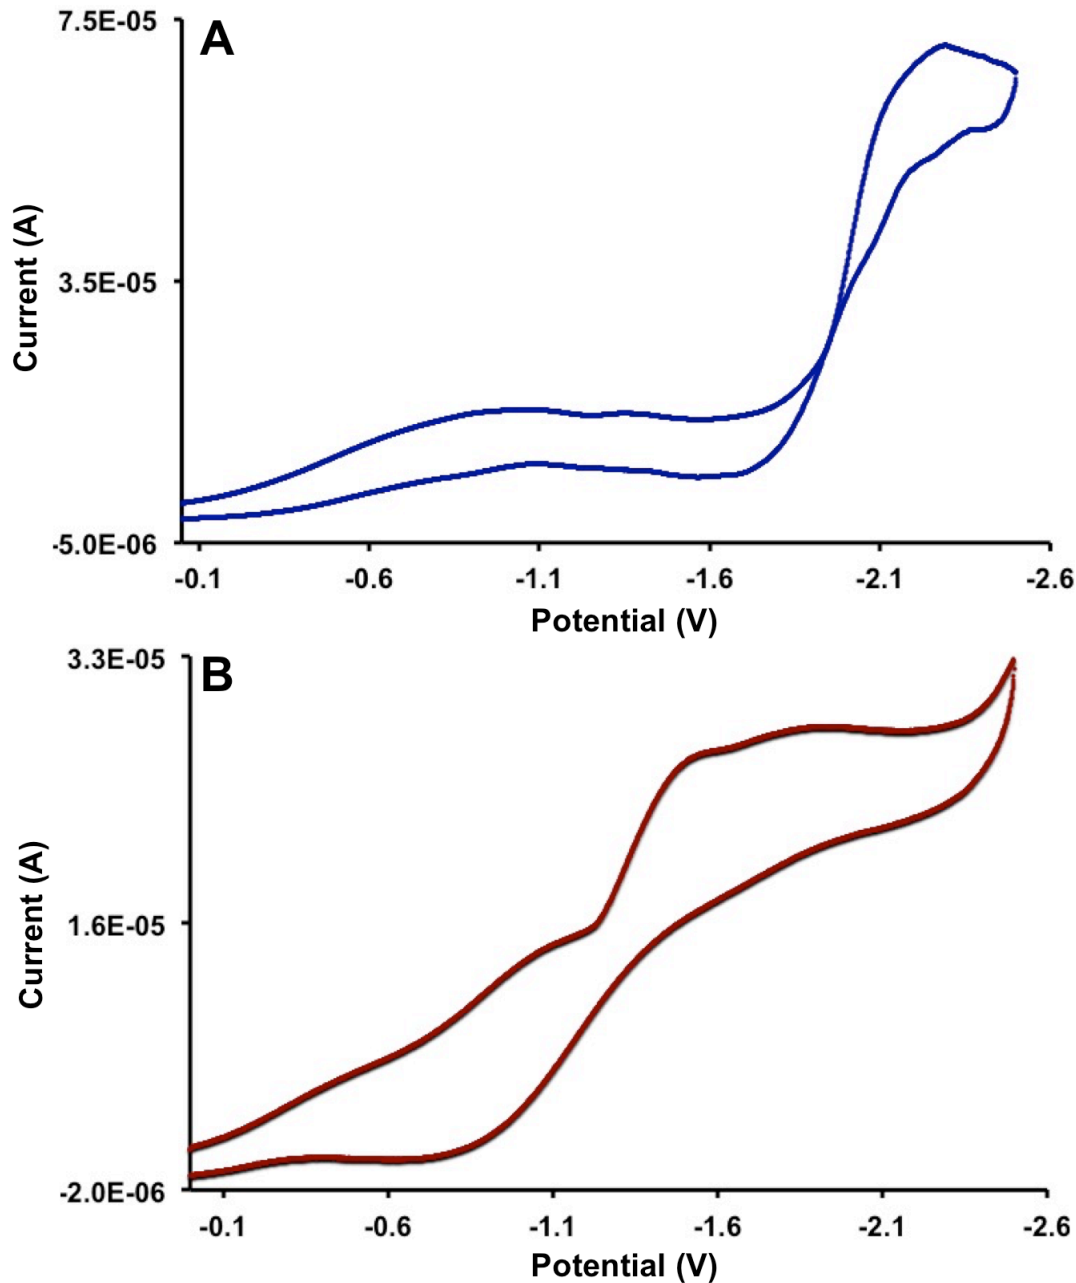

**Figure S2.** Cyclic voltammetry experiments. (A) Cyclic voltammogram of 1•HCl in MeCN ([1•HCl] = 1 mM). Potentials are referenced against Ag/AgNO<sub>3</sub>. (B) Cyclic voltammogram of 2•HCl in MeCN ([2•HCl] = 1 mM). Potentials are referenced against Ag/AgNO<sub>3</sub>.
